# Supplementary material for: A systematic review to identify biomarkers of intake for fermented food products
Source: PubMed Central journal article supplement (PMC8058972; doi:10.1186/s12263-021-00686-4), 2021-04-21
Supplement: 12263_2021_686_MOESM1_ESM.pdf [file 12263_2021_686_MOESM1_ESM.pdf]

## Additional File 1

| <b>Food-Specific Keywords Used in the Literature Search for Candidate Biomarkers of Fermented Food Intake</b> |                 |                                  |                                                                                                                                                                                                                                                                                                   |
|---------------------------------------------------------------------------------------------------------------|-----------------|----------------------------------|---------------------------------------------------------------------------------------------------------------------------------------------------------------------------------------------------------------------------------------------------------------------------------------------------|
| <b>Operator</b>                                                                                               | <b>Database</b> | <b>Field</b>                     | <b>Keywords</b>                                                                                                                                                                                                                                                                                   |
| <b>General Fermented Foods</b>                                                                                |                 |                                  |                                                                                                                                                                                                                                                                                                   |
| AND                                                                                                           | Pubmed          | Title/Abstract                   | ferment* OR "fermented food*" OR "fermented product"                                                                                                                                                                                                                                              |
|                                                                                                               | Web of Science  | Topic                            |                                                                                                                                                                                                                                                                                                   |
|                                                                                                               | Scopus          | Article Title/Abstract/Keyw ords |                                                                                                                                                                                                                                                                                                   |
| <b>Fermented Dairy</b>                                                                                        |                 |                                  |                                                                                                                                                                                                                                                                                                   |
| AND                                                                                                           | Pubmed          | Title/Abstract                   | cheese OR yoghurt OR yogurt OR yoghourt OR yakult OR "creme fraiche" OR quark OR kefir OR lassi OR "sour cream" OR "soured milk" OR "cultured milk" OR "cultured dairy" OR "fermented dairy" OR "fermented milk" OR buttermilk                                                                    |
|                                                                                                               | Web of Science  | Topic                            |                                                                                                                                                                                                                                                                                                   |
|                                                                                                               | Scopus          | Article Title/Abstract/Keyw ords |                                                                                                                                                                                                                                                                                                   |
| NOT                                                                                                           | Pubmed          | Title/Abstract                   | "breast milk" OR "breast feeding" OR bone OR muscle OR allerg* OR "phyto ster*" OR "plant ster*" OR phytoster* OR new born* OR infant*                                                                                                                                                            |
|                                                                                                               | Web of Science  | Topic                            |                                                                                                                                                                                                                                                                                                   |
|                                                                                                               | Scopus          | Article Title/Abstract/Keyw ords |                                                                                                                                                                                                                                                                                                   |
| <b>Fermented Meat &amp; Fish</b>                                                                              |                 |                                  |                                                                                                                                                                                                                                                                                                   |
| AND                                                                                                           | Pubmed          | Title/Abstract                   | "fermented meat" OR salami OR pepperoni OR chorizo OR cervelat OR mettwurst OR "summer sausage" OR sucuk OR "fermented sausage" OR "cured meat" OR "dried meat" OR "dry sausages" OR "dried sausages" OR "processed meat" OR "fermented fish" OR "fish sauce" OR "shrimp paste" OR "shrimp sauce" |
|                                                                                                               | Web of Science  | Topic                            |                                                                                                                                                                                                                                                                                                   |
|                                                                                                               | Scopus          | Article Title/Abstract/Keyw ords |                                                                                                                                                                                                                                                                                                   |
| <b>Fermented Fruits &amp; Vegetables</b>                                                                      |                 |                                  |                                                                                                                                                                                                                                                                                                   |
| AND                                                                                                           | Pubmed          | Title/Abstract                   | "fermented vegetable*" OR "fermented fruit*" OR sauerkraut OR olive* OR pickle* OR "fermented cucumber*" OR kimchi OR paocai                                                                                                                                                                      |
|                                                                                                               | Web of Science  | Topic                            |                                                                                                                                                                                                                                                                                                   |
|                                                                                                               | Scopus          | Article Title/Abstract/Keyw ords |                                                                                                                                                                                                                                                                                                   |
| NOT                                                                                                           | Pubmed          | Title/Abstract                   | oil* OR "olive leaf extract"                                                                                                                                                                                                                                                                      |
|                                                                                                               | Web of Science  | Topic                            |                                                                                                                                                                                                                                                                                                   |
|                                                                                                               | Scopus          | Article Title/Abstract/Keyw ords |                                                                                                                                                                                                                                                                                                   |
| <b>Fermented Legumes (Including Soy)</b>                                                                      |                 |                                  |                                                                                                                                                                                                                                                                                                   |
| AND                                                                                                           | Pubmed          | Title/Abstract                   | "fermented soy*" OR "fermented bean" OR "soy sauce" OR "soya sauce" OR "soybean paste" OR miso OR tempeh OR natto OR cheonggukjang OR doenjang OR doubanjiang OR douchi OR gochujang                                                                                                              |
|                                                                                                               | Web of Science  | Topic                            |                                                                                                                                                                                                                                                                                                   |
|                                                                                                               | Scopus          | Article Title/Abstract/Keyw ords |                                                                                                                                                                                                                                                                                                   |
| NOT                                                                                                           | Pubmed          | Title/Abstract                   | milk OR allerg*                                                                                                                                                                                                                                                                                   |
|                                                                                                               | Web of Science  | Topic                            |                                                                                                                                                                                                                                                                                                   |
|                                                                                                               | Scopus          | Article Title/Abstract/Keyw ords |                                                                                                                                                                                                                                                                                                   |
| <b>Fermented Cereals &amp; Grains</b>                                                                         |                 |                                  |                                                                                                                                                                                                                                                                                                   |
| AND                                                                                                           | Pubmed          | Title/Abstract                   | "fermented cereal*" OR "fermented grain*" OR "fermented wheat" OR "fermented oat*" OR "fermented rice" OR bread* OR sourdough OR crispbread                                                                                                                                                       |
|                                                                                                               | Web of Science  | Topic                            |                                                                                                                                                                                                                                                                                                   |
|                                                                                                               | Scopus          | Article Title/Abstract/Keyw ords |                                                                                                                                                                                                                                                                                                   |
| <b>Fermented Beverages</b>                                                                                    |                 |                                  |                                                                                                                                                                                                                                                                                                   |

|              |                |                                  |                                                                                                                                                                                                          |
|--------------|----------------|----------------------------------|----------------------------------------------------------------------------------------------------------------------------------------------------------------------------------------------------------|
| AND          | Pubmed         | Title/Abstract                   | "fermented beverage*" OR "fermented drink*" OR beer OR wine OR cider OR kombucha OR pulque OR coffee OR "fermented tea" OR "dark tea" OR "yellow tea" OR puer OR pu'er OR puer* OR fuzhuan OR "fu zhuan" |
|              | Web of Science | Topic                            |                                                                                                                                                                                                          |
|              | Scopus         | Article Title/Abstract/Keyw ords |                                                                                                                                                                                                          |
| NOT          | Pubmed         | Title/Abstract                   | poison* OR drug* OR smoking OR toxic*                                                                                                                                                                    |
|              | Web of Science | Topic                            |                                                                                                                                                                                                          |
|              | Scopus         | Article Title/Abstract/Keyw ords |                                                                                                                                                                                                          |
| <b>Other</b> |                |                                  |                                                                                                                                                                                                          |
| AND          | Pubmed         | Title/Abstract                   | chocolate OR cocoa OR "fermented condiment" OR "vinegar" OR tabasco OR w orcestershire OR w orcester                                                                                                     |
|              | Web of Science | Topic                            |                                                                                                                                                                                                          |
|              | Scopus         | Article Title/Abstract/Keyw ords |                                                                                                                                                                                                          |
