# Supplementary material for: A systematic review to identify biomarkers of intake for fermented food products
Source: PubMed Central journal article supplement (PMC8058972; doi:10.1186/s12263-021-00686-4), 2021-04-21
Supplement: 12263_2021_686_MOESM2_ESM.pdf [file 12263_2021_686_MOESM2_ESM.pdf]

## Additional File 2

| <b>Operators Used in the Literature Search for Candidate Biomarkers of Fermented Food Intake</b> |                 |                                  |                                                                                                                                    |
|--------------------------------------------------------------------------------------------------|-----------------|----------------------------------|------------------------------------------------------------------------------------------------------------------------------------|
| <b>Operator</b>                                                                                  | <b>Database</b> | <b>Field</b>                     | <b>Keywords</b>                                                                                                                    |
| AND                                                                                              | Pubmed          | All fields                       | biomarker* OR marker* OR metabolite* OR biokinetics OR biotransformation OR pharmacokinetics                                       |
|                                                                                                  | Web of Science  | Topic                            |                                                                                                                                    |
|                                                                                                  | Scopus          | Article Title/Abstract/Keyw ords |                                                                                                                                    |
| AND                                                                                              | Pubmed          | All fields                       | intake* OR meal* OR diet* OR ingestion OR consumption OR eat* OR drink* OR administration                                          |
|                                                                                                  | Web of Science  | Topic                            |                                                                                                                                    |
|                                                                                                  | Scopus          | Article Title/Abstract/Keyw ords |                                                                                                                                    |
| AND                                                                                              | Pubmed          | All fields                       | human* OR men OR w omen OR patient* OR volunteer* OR participant* OR individual* OR subject*                                       |
|                                                                                                  | Web of Science  | Topic                            |                                                                                                                                    |
|                                                                                                  | Scopus          | Article Title/Abstract/Keyw ords |                                                                                                                                    |
| AND                                                                                              | Pubmed          | All fields                       | urine OR plasma OR blood OR serum OR excretion OR tissue* OR faeces OR feces OR "fecal w ater" OR "faecal w ater" OR nail* OR hair |
|                                                                                                  | Web of Science  | Topic                            |                                                                                                                                    |
|                                                                                                  | Scopus          | Article Title/Abstract/Keyw ords |                                                                                                                                    |
