# Supplementary material for: A systematic review to identify biomarkers of intake for fermented food products
Source: PubMed Central journal article supplement (PMC8058972; doi:10.1186/s12263-021-00686-4), 2021-04-21
Supplement: 12263_2021_686_MOESM3_ESM.pdf [file 12263_2021_686_MOESM3_ESM.pdf]

### Additional File 3

| Summary of Untargeted Studies Presenting Candidate FIBs for Fermented Foods |                                         |                                                                       |                                                                              |                        |                   |           |                                                                                                                                                                                                                                                                                                                                                                                                                                                                                                                                                                                                                                                                                                                                                                                                                                                                                                                                                                                                                                                                                                                                                                                                     |           |
|-----------------------------------------------------------------------------|-----------------------------------------|-----------------------------------------------------------------------|------------------------------------------------------------------------------|------------------------|-------------------|-----------|-----------------------------------------------------------------------------------------------------------------------------------------------------------------------------------------------------------------------------------------------------------------------------------------------------------------------------------------------------------------------------------------------------------------------------------------------------------------------------------------------------------------------------------------------------------------------------------------------------------------------------------------------------------------------------------------------------------------------------------------------------------------------------------------------------------------------------------------------------------------------------------------------------------------------------------------------------------------------------------------------------------------------------------------------------------------------------------------------------------------------------------------------------------------------------------------------------|-----------|
| Fermented Food                                                              | Intervention                            | Dose                                                                  | Study Design                                                                 | <i>n</i>               | Analytical Method | Biosample | Candidate FIBs <sup>a</sup>                                                                                                                                                                                                                                                                                                                                                                                                                                                                                                                                                                                                                                                                                                                                                                                                                                                                                                                                                                                                                                                                                                                                                                         | Reference |
| Cocoa                                                                       | New Nordic Diet vs. Average Danish Diet | 15±7 g/day (derived from 3-day weighted food records)                 | 6-month, randomized, controlled, parallel                                    | 107 healthy volunteers | U(H)PLC-QTOF-MS   | Urine     | <ul style="list-style-type: none"> <li>• 7-Methyluric acid</li> <li>• AMMU</li> <li>• Theobromine</li> </ul>                                                                                                                                                                                                                                                                                                                                                                                                                                                                                                                                                                                                                                                                                                                                                                                                                                                                                                                                                                                                                                                                                        | (1)       |
| Cocoa                                                                       | New Nordic Diet vs. Average Danish Diet | Exact intakes not reported (derived from 3-day weighted food records) | 6 month, randomized, controlled, parallel; 3-day weighted food records (24h) | 161 healthy adults     | U(H)PLC-QTOF-MS   | Urine     | <ul style="list-style-type: none"> <li>• <b>3,7-Dimethyluric acid</b></li> <li>• <b>7-Methyluric acid</b></li> <li>• <b>7-Methylxanthine</b></li> <li>• <b>AMMU</b></li> <li>• <b>Theobromine</b></li> </ul>                                                                                                                                                                                                                                                                                                                                                                                                                                                                                                                                                                                                                                                                                                                                                                                                                                                                                                                                                                                        | (2)       |
| Cocoa                                                                       | Cocoa or derived products               | ≥3x30 g/week chocolate and/or cocoa powder                            | Cross-sectional                                                              | 64 healthy adults      | HPLC-QTOF-MS      | Urine     | <ul style="list-style-type: none"> <li>• <b>(Epi)catechin glucuronide</b></li> <li>• <b>(Epi)catechin sulfate</b></li> <li>• <b>3,7-Dimethyluric acid</b></li> <li>• <b>3-Methyluric acid</b></li> <li>• <b>3-Methylxanthine</b></li> <li>• <b>4-Hydroxy-5-(dihydroxyphenyl) valeric acid</b></li> <li>• <b>4-Hydroxy-5-(dihydroxyphenyl) valeric acid glucuronide</b></li> <li>• <b>4-Hydroxy-5-(dihydroxyphenyl) valeric acid sulfate</b></li> <li>• <b>4-Hydroxy-5-(hydroxy-methoxyphenyl) valeric acid sulfate</b></li> <li>• <b>4-Hydroxy-5-(hydroxyphenyl) valeric acid sulfate</b></li> <li>• <b>4-Hydroxy-5-(hydroxyphenyl) valeric acid sulfate</b></li> <li>• <b>4-Hydroxy-5-(phenyl) valeric acid sulfate</b></li> <li>• <b>7-Methylxanthine</b></li> <li>• <b>AMMU</b></li> <li>• <b>AMMU isomer</b></li> <li>• <b>Aspartyl-phenylalanine</b></li> <li>• <b>Cyclo(aspartylphenylalanyl)</b></li> <li>• <b>DHPV sulfoglucuronide</b></li> <li>• <b>DHPV glucuronide</b></li> <li>• <b>DHPV sulfate</b></li> <li>• <b>Furoylglycine</b></li> <li>• <b>Hydroxyphenyl-valerolactone glucuronide</b></li> <li>• <b>Hydroxyphenyl-valerolactone sulfate</b></li> <li>• <b>MHPV</b></li> </ul> | (3)       |

| Summary of Untargeted Studies Presenting Candidate FIBs for Fermented Foods |                                                |                                 |                                           |                                 |                   |           |                                                                                                                                                                                                                                                                                                                                                                                                                                                                                                                                                                                                                                                                                                                                                                   |           |
|-----------------------------------------------------------------------------|------------------------------------------------|---------------------------------|-------------------------------------------|---------------------------------|-------------------|-----------|-------------------------------------------------------------------------------------------------------------------------------------------------------------------------------------------------------------------------------------------------------------------------------------------------------------------------------------------------------------------------------------------------------------------------------------------------------------------------------------------------------------------------------------------------------------------------------------------------------------------------------------------------------------------------------------------------------------------------------------------------------------------|-----------|
| Fermented Food                                                              | Intervention                                   | Dose                            | Study Design                              | <i>n</i>                        | Analytical Method | Biosample | Candidate FIBs <sup>a</sup>                                                                                                                                                                                                                                                                                                                                                                                                                                                                                                                                                                                                                                                                                                                                       | Reference |
|                                                                             |                                                |                                 |                                           |                                 |                   |           | <ul style="list-style-type: none"> <li>• MHPV glucuronide</li> <li>• Theobromine</li> <li>• Vanillic acid</li> <li>• Vanillin sulfate</li> <li>• Xanthine</li> </ul>                                                                                                                                                                                                                                                                                                                                                                                                                                                                                                                                                                                              |           |
| Cocoa                                                                       | Cocoa powder in water vs. cocoa powder in milk | 40 g/day + 250 mL water or milk | Acute, randomized, controlled, crossover  | 10 healthy adults               | HPLC-QTOF         | Urine     | <ul style="list-style-type: none"> <li>• 3,5-Diethyl-2-methylpyrazine</li> <li>• 3,7-Dimethyluric acid</li> <li>• 3-Methyluric acid</li> <li>• 3-Methylxanthine</li> <li>• 4-hydroxy-5-(3,4-dihydroxyphenyl) valeric acid</li> <li>• 7-Methyluric acid</li> <li>• 7-Methylxanthine</li> <li>• AMMU</li> <li>• Caffeine</li> <li>• Cyclo(Pro-Pro)</li> <li>• Cyclo(Ser-Tyr)</li> <li>• DHPV glucuronide</li> <li>• DHPV sulfate</li> <li>• Epicatechin-O-sulfate</li> <li>• Hydroxyacetophenone</li> <li>• Hydroxynicotinic acid</li> <li>• MHPV</li> <li>• MHPV glucuronide</li> <li>• O-Methylepicatechin</li> <li>• Theobromine</li> <li>• Trigonelline</li> <li>• Tyrosine</li> <li>• Tyrosine</li> <li>• Vanillic acid</li> <li>• Vanilloylglycine</li> </ul> | (4)       |
| Cocoa                                                                       | Cocoa powder in milk vs. milk only             | 40 g/day + 500 mL skimmed milk  | 8-week, randomized, controlled, crossover | 20 patients at high risk of CVD | HPLC-QTOF         | Urine     | <ul style="list-style-type: none"> <li>• (Epi)catechin glucuronide</li> <li>• N-[4-hydroxy-3-methoxy-E-cinnamoyl]-L-aspartic acid</li> <li>• N-[4-hydroxycinnamoyl]-L-aspartic acid</li> <li>• Theobromine</li> <li>• Vanillic acid glucuronide</li> <li>• Vanillic acid sulfoglucuronide</li> <li>• Vanilloylglycine</li> <li>• 3,5-Diethyl-2-methylpyrazine</li> <li>• 3,7-Dimethyluric acid</li> <li>• 3-Methyluric acid</li> <li>• 3-Methylxanthine</li> <li>• 4-Hydroxy-5-(dihydroxyphenyl) valeric acid glucuronide</li> </ul>                                                                                                                                                                                                                              | (5)       |

| Summary of Untargeted Studies Presenting Candidate FIBs for Fermented Foods |                                                             |                                                          |                                          |                   |                   |           |                                                                                                                                                                                                                                                                                                                                                                                                                                                                                                                                                         |           |
|-----------------------------------------------------------------------------|-------------------------------------------------------------|----------------------------------------------------------|------------------------------------------|-------------------|-------------------|-----------|---------------------------------------------------------------------------------------------------------------------------------------------------------------------------------------------------------------------------------------------------------------------------------------------------------------------------------------------------------------------------------------------------------------------------------------------------------------------------------------------------------------------------------------------------------|-----------|
| Fermented Food                                                              | Intervention                                                | Dose                                                     | Study Design                             | <i>n</i>          | Analytical Method | Biosample | Candidate FIBs <sup>a</sup>                                                                                                                                                                                                                                                                                                                                                                                                                                                                                                                             | Reference |
|                                                                             |                                                             |                                                          |                                          |                   |                   |           | <ul style="list-style-type: none"> <li>• 4-Hydroxy-5-(dihydroxyphenyl) valeric acid sulfate</li> <li>• 4-Hydroxy-5-(hydroxy-methoxyphenyl) valeric acid glucuronide</li> <li>• 7-Methyluric acid</li> <li>• 7-Methylxanthine</li> <li>• AMMU</li> <li>• Cyclo(propylalanyl)</li> <li>• DHPV glucuronide</li> <li>• DHPV sulfoglucuronide</li> <li>• DHPV sulfate</li> <li>• Epicatechin sulfoglucuronide</li> <li>• Hydroxyphenyl-γ-valerolactone glucuronide</li> <li>• Methyl(epi)catechin sulfate</li> <li>• MHPV</li> <li>• MHPV sulfate</li> </ul> |           |
| Cocoa                                                                       | Cocoa powder in milk                                        | 40 g/day + 250 mL milk                                   | Acute intervention                       | 10 healthy adults | HPLC-QTOF-MS      | Urine     | <ul style="list-style-type: none"> <li>• 3-Methylxanthine</li> <li>• Theobromine</li> <li>• Vanilloylglycine</li> <li>• Xanthurenic acid</li> <li>• 7-Methylxanthine</li> <li>• DHPV glucuronide</li> <li>• Furoylglycine</li> <li>• <b>N-methylguanine</b></li> </ul>                                                                                                                                                                                                                                                                                  | (6)       |
| Cocoa                                                                       | Chocolate (Flavan-3-ol-enriched dark, standard dark, white) | 60 g + 400 mL still table water (200 mL in TO 2h and 4h) | Acute, randomized, controlled, crossover | 42 healthy adults | NMR               | Urine     | <ul style="list-style-type: none"> <li>• <b>2-Hydroxyisobutyrate</b></li> <li>• <b>3-Hydroxyisobutyrate</b></li> <li>• <b>3-Hydroxyisobutyrate</b></li> <li>• <b>4-Hydroxyphenylacetate</b></li> <li>• Arginine</li> <li>• Creatinine</li> <li>• Alanine</li> <li>• Dimethylamine</li> <li>• Glycine</li> <li>• Lactate</li> <li>• N-acetylated compounds</li> <li>• N-methylnicotinamide</li> <li>• Pyruvate</li> <li>• Theobromine</li> <li>• Tyrosine</li> <li>• Valine</li> <li>• Epicatechin derivative</li> <li>• Methylxanthines</li> </ul>      | (7)       |
|                                                                             |                                                             |                                                          |                                          |                   | LC-MS             |           | <ul style="list-style-type: none"> <li>• Caffeine</li> <li>• DHPV glucuronide</li> </ul>                                                                                                                                                                                                                                                                                                                                                                                                                                                                |           |

| Summary of Untargeted Studies Presenting Candidate FIBs for Fermented Foods |              |                                                      |                    |                         |                   |              |                                                                                                                                                                                                                                                                                                                                                                                                                                                                                                                                                                                                                                                                                                                                                                                                                                    |           |
|-----------------------------------------------------------------------------|--------------|------------------------------------------------------|--------------------|-------------------------|-------------------|--------------|------------------------------------------------------------------------------------------------------------------------------------------------------------------------------------------------------------------------------------------------------------------------------------------------------------------------------------------------------------------------------------------------------------------------------------------------------------------------------------------------------------------------------------------------------------------------------------------------------------------------------------------------------------------------------------------------------------------------------------------------------------------------------------------------------------------------------------|-----------|
| Fermented Food                                                              | Intervention | Dose                                                 | Study Design       | <i>n</i>                | Analytical Method | Biosample    | Candidate FIBs <sup>a</sup>                                                                                                                                                                                                                                                                                                                                                                                                                                                                                                                                                                                                                                                                                                                                                                                                        | Reference |
|                                                                             |              |                                                      |                    |                         |                   |              | <ul style="list-style-type: none"> <li>• DHPV sulfate</li> <li>• Epicatechin-O-sulfate</li> <li>• Hydroxynicotinic acid</li> <li>• MHPV glucuronide</li> <li>• O-feruloylquininate</li> <li>• Vanilloylglycine</li> <li>• Epicatechin derivative</li> <li>• Methylxanthines</li> <li>• 3,7-Dimethylurate</li> <li>• 4-hydroxy-5-(3,4-dihydroxyphenyl) valeric acid</li> <li>• 7- and 3-methyluric acid</li> <li>• 7- and 3-methylxanthine</li> <li>• AMMU</li> </ul>                                                                                                                                                                                                                                                                                                                                                               |           |
| Cocoa, wine                                                                 | Chocolate    | Habitual intake (dose not reported); assessed by FFQ | Prospective cohort | 3559 adult female twins | U(H)PLC-MS/MS     | Serum/plasma | <ul style="list-style-type: none"> <li>• 7-Methylxanthine</li> <li>• Theobromine</li> <li>• 1-Methylxanthine</li> <li>• 3-Hydroxypyridine sulfate</li> <li>• 3-Methyl catechol sulfate</li> <li>• Catechol sulfate</li> <li>• Cyclo(leu-pro)</li> <li>• O-methylcatechol sulfate</li> <li>• Quinate</li> </ul>                                                                                                                                                                                                                                                                                                                                                                                                                                                                                                                     | (8)       |
|                                                                             | Wine         | Habitual intake (dose not reported); assessed by FFQ |                    |                         |                   |              | <ul style="list-style-type: none"> <li>• 1-docosahexaenoylglycerophospho ethanolamine</li> <li>• 2-aminobutyrate</li> <li>• 2-hydroxybutyrate</li> <li>• 2-Hydroxyisovalerate</li> <li>• 3-(4-hydroxyphenyl) lactate</li> <li>• 3-Methyl-2-oxobutyrate</li> <li>• 4-androsten-3beta,17beta-diol disulfate</li> <li>• 4-Methyl-2-oxopentanoate</li> <li>• 5-alpha-androstan-3beta-17beta-diol disulfate</li> <li>• Arachidonate (20:4n6)</li> <li>• Benzoate</li> <li>• beta-hydroxyisovalerate</li> <li>• Caprate (10:0)</li> <li>• Caprylate (8:0)</li> <li>• Docosahexaenoate (22:6n3)</li> <li>• Docosapentaenoate (22:5n3)</li> <li>• Eicosapentaenoate (20:5n3)</li> <li>• Epiandrosterone sulfate</li> <li>• myo-Inositol</li> <li>• Phosphatidylcholine diacyl C32:1</li> <li>• Phosphatidylcholine diacyl C36:5</li> </ul> |           |

| Summary of Untargeted Studies Presenting Candidate FIBs for Fermented Foods |                                                                                    |                  |                                    |                         |                      |               |                                                                                                                                                                                                                                                                                                                                                                                                                                                                                                                                                                                                                                                                                                                                                                                                                                                                                                                                                                                |           |
|-----------------------------------------------------------------------------|------------------------------------------------------------------------------------|------------------|------------------------------------|-------------------------|----------------------|---------------|--------------------------------------------------------------------------------------------------------------------------------------------------------------------------------------------------------------------------------------------------------------------------------------------------------------------------------------------------------------------------------------------------------------------------------------------------------------------------------------------------------------------------------------------------------------------------------------------------------------------------------------------------------------------------------------------------------------------------------------------------------------------------------------------------------------------------------------------------------------------------------------------------------------------------------------------------------------------------------|-----------|
| Fermented Food                                                              | Intervention                                                                       | Dose             | Study Design                       | n                       | Analytical Method    | Biosample     | Candidate FIBs <sup>a</sup>                                                                                                                                                                                                                                                                                                                                                                                                                                                                                                                                                                                                                                                                                                                                                                                                                                                                                                                                                    | Reference |
|                                                                             |                                                                                    |                  |                                    |                         |                      |               | <ul style="list-style-type: none"> <li>• <b>Pipecolate</b></li> <li>• <b>Piperine</b></li> <li>• <b>Scyllo-inositol</b></li> <li>• <b>Stearidonate (18:4n3)</b></li> <li>• <b>Theophylline</b></li> </ul>                                                                                                                                                                                                                                                                                                                                                                                                                                                                                                                                                                                                                                                                                                                                                                      |           |
| Cocoa                                                                       | Chocolate (80% cocoa)                                                              | 100 or 200 g/day | 2-day, randomized, controlled      | 15 healthy young adults | U(H)PLC-ESI-QTOF-MS  | Urine         | <ul style="list-style-type: none"> <li>• Epicatechin-O-sulfate</li> <li>• Epicatechin-O-glucuronide</li> <li>• O-Methyl-epicatechin-O-sulfate</li> <li>• O-Methyl-epicatechin-O-glucuronide</li> <li>• O-Methyl-epicatechin-sulfate-O-glucuronide</li> <li>• O-Methyl-epicatechin-disulfate-O-glucuronide</li> <li>• Epicatechin-O-glucoside</li> <li>• 5-(Hydroxyphenyl)-g-valerolactone-O-glucuronide</li> <li>• 5-(Hydroxyphenyl)-g-valerolactone-O-glucuronide</li> <li>• 5-Phenyl-g-valerolactone-glucuronide</li> <li>• 5-Phenyl-g-valerolactone-methoxy-glucuronide</li> <li>• 5-(Tri hydroxyphenyl)-g-valerolactone-glucuronide</li> <li>• 5-(Hydroxy phenyl)-g-valerolactone-methoxy-sulfate</li> <li>• 5-(Dihydroxy phenyl)-g-valerolactone-sulfate</li> <li>• 5-Phenyl-g-valerolactone-methoxy-sulfate</li> <li>• 5-(Hydroxyphenyl)-g-valerolactone-sulfate</li> <li>• 5-Phenyl-g-valerolactone-sulfate</li> <li>• 5-(Dihydroxy phenyl)-g-valero lactone</li> </ul> | (9)       |
| Cocoa                                                                       | Dark chocolate (74% cocoa) consumption in volunteers with different anxiety traits | 40 g/day         | 2-week, randomized, parallel, open | 30 healthy volunteers   | NMR, GC-MS, LC-MS/MS | Plasma, urine | <ul style="list-style-type: none"> <li>• Asparagine</li> <li>• Corticosterone</li> <li>• Cortisol</li> <li>• Cystine</li> <li>• 4-Hydroxyphenylacetate</li> <li>• Adrenaline</li> <li>• Glucose-6-phosphate</li> <li>• Normetanephine</li> <li>• Threonic acid</li> <li>• Phenylacetylglutamine</li> <li>• p-Cresol sulfate</li> <li>• (Significant in urine, but not plasma; dark chocolate consumption further modulated metabolites associated with anxiety traits)</li> </ul>                                                                                                                                                                                                                                                                                                                                                                                                                                                                                              | (10)      |
| Cocoa                                                                       | Chocolate consumption between 'chocolate desiring' vs. 'chocolate                  | 50 g             | 5-day, double crossover            | 22 healthy men          | NMR                  | Urine         | <ul style="list-style-type: none"> <li>• <b>2-hydroxyhippurate</b></li> <li>• <b>2-Hydroxyisobutyrate</b></li> <li>• <b>4-cresol</b></li> <li>• <b>Acetone</b></li> <li>• <b>Carnitine</b></li> <li>• <b>Isobutyrate</b></li> </ul>                                                                                                                                                                                                                                                                                                                                                                                                                                                                                                                                                                                                                                                                                                                                            | (11)      |

| Summary of Untargeted Studies Presenting Candidate FIBs for Fermented Foods |                          |                                               |                     |                          |                   |           |                                                                                                                                                                                                                                                                                                                                                                                                       |           |
|-----------------------------------------------------------------------------|--------------------------|-----------------------------------------------|---------------------|--------------------------|-------------------|-----------|-------------------------------------------------------------------------------------------------------------------------------------------------------------------------------------------------------------------------------------------------------------------------------------------------------------------------------------------------------------------------------------------------------|-----------|
| Fermented Food                                                              | Intervention             | Dose                                          | Study Design        | <i>n</i>                 | Analytical Method | Biosample | Candidate FIBs <sup>a</sup>                                                                                                                                                                                                                                                                                                                                                                           | Reference |
|                                                                             | indifferent' individuals |                                               |                     |                          |                   |           | <ul style="list-style-type: none"> <li>• <b>Methylsuccinate</b></li> <li>• <b>N-acetyl-carnitine</b></li> <li>• <b>Taurine</b></li> <li>• <b>Trigonelline</b></li> <li>• <b>Trimethylamine</b></li> <li>• 3-Hydroxyisobutyrate</li> <li>• 4-Hydroxyphenylacetate</li> <li>• Acetoacetate</li> <li>• Citrate</li> <li>• Dimethylglycine</li> <li>• Glycine</li> <li>• Phenylacetylglutamine</li> </ul> |           |
| Cocoa, coffee, wine                                                         | Chocolate candies        | Habitual intake; dose not reported (from FFQ) | Nested case-control | 1369 premenopausal women | U(H)PLC-MS/MS     | Serum     | <ul style="list-style-type: none"> <li>• <b>3,7-Dimethylurate</b></li> <li>• <b>3-Methylxanthine</b></li> <li>• <b>7-Methylurate</b></li> <li>• <b>7-Methylxanthine</b></li> <li>• <b>Theobromine</b></li> </ul>                                                                                                                                                                                      | (12)      |
|                                                                             | Coffee, caffeinated      | Habitual intake; dose not reported (from FFQ) |                     |                          |                   |           | <ul style="list-style-type: none"> <li>• <b>1,3,7-Trimethylurate</b></li> <li>• <b>1,3-Dimethylurate</b></li> <li>• <b>1,7-Dimethylurate</b></li> <li>• <b>1-Methylurate</b></li> <li>• <b>1-Methylxanthine</b></li> <li>• <b>AAMU</b></li> <li>• <b>Caffeine</b></li> <li>• <b>Paraxanthine</b></li> <li>• <b>Theophylline</b></li> </ul>                                                            |           |
|                                                                             | Coffee, decaffeinated    | Habitual intake; dose not reported (from FFQ) |                     |                          |                   |           | <ul style="list-style-type: none"> <li>• <b>2,3-dihydropyridine</b></li> </ul>                                                                                                                                                                                                                                                                                                                        |           |
|                                                                             | Red wine                 | Habitual intake; dose not reported (from FFQ) |                     |                          |                   |           | <ul style="list-style-type: none"> <li>• <b>2,3-Dihydroxyisovalerate</b></li> <li>• <b>Ethyl glucuronide</b></li> </ul>                                                                                                                                                                                                                                                                               |           |
|                                                                             | Total coffee             | Habitual intake; dose not reported (from FFQ) |                     |                          |                   |           | <ul style="list-style-type: none"> <li>• <b>3-Hydroxypyridine sulfate</b></li> <li>• <b>3-Methyl catechol sulfate</b></li> <li>• <b>Citraconate/glutaconate</b></li> <li>• <b>Quinate</b></li> <li>• <b>Trigonelline</b></li> </ul>                                                                                                                                                                   |           |
|                                                                             | Total wine               | Habitual intake; dose not reported (from FFQ) |                     |                          |                   |           | <ul style="list-style-type: none"> <li>• <b>2,3-Dihydroxyisovalerate</b></li> <li>• <b>Androstenediol (3<math>\beta</math>,17<math>\beta</math>) monosulfate</b></li> <li>• <b>3-Carboxy-4-methyl-5-propyl-2-furanpropanoic acid</b></li> <li>• <b>Ethyl glucuronide</b></li> </ul>                                                                                                                   |           |

| Summary of Untargeted Studies Presenting Candidate FIBs for Fermented Foods |                                                         |                                                  |                                           |                    |                   |           |                                                                                                                                                                                                                                                                                                                                                                                                                                                                                                                                                                                                                                                                                                                                                                                                                                                                         |           |
|-----------------------------------------------------------------------------|---------------------------------------------------------|--------------------------------------------------|-------------------------------------------|--------------------|-------------------|-----------|-------------------------------------------------------------------------------------------------------------------------------------------------------------------------------------------------------------------------------------------------------------------------------------------------------------------------------------------------------------------------------------------------------------------------------------------------------------------------------------------------------------------------------------------------------------------------------------------------------------------------------------------------------------------------------------------------------------------------------------------------------------------------------------------------------------------------------------------------------------------------|-----------|
| Fermented Food                                                              | Intervention                                            | Dose                                             | Study Design                              | n                  | Analytical Method | Biosample | Candidate FIBs <sup>a</sup>                                                                                                                                                                                                                                                                                                                                                                                                                                                                                                                                                                                                                                                                                                                                                                                                                                             | Reference |
|                                                                             | White wine                                              | Habitual intake; dose not reported (from FFQ)    |                                           |                    |                   |           | <ul style="list-style-type: none"> <li>• Oleoyl-linoleoyl-glycerol (18:1/18:2)</li> <li>• Sphingomyelin (d18:2/18:1)</li> <li>• 2,3-Dihydroxyisovalerate</li> <li>• Ethyl glucuronide</li> </ul>                                                                                                                                                                                                                                                                                                                                                                                                                                                                                                                                                                                                                                                                        |           |
| Bread                                                                       | Wholegrain sourdough rye at different doses             | 0 g/day, 48 g/day, 96 g/day                      | 4-week, randomized, controlled, crossover | 33 healthy adults  | FIE-MS            | Urine     | <ul style="list-style-type: none"> <li>• HBOA glucuronide</li> <li>• HHPAA glucuronide</li> <li>• HHPAA sulfate</li> <li>• C13H21O3 glucuronide</li> <li>• C14H25O4 glucuronide</li> <li>• Creatinine</li> <li>• HPAA sulfate</li> <li>• N-feruloylglycine sulfate</li> <li>• Phenylacetylglutamine derivative</li> </ul>                                                                                                                                                                                                                                                                                                                                                                                                                                                                                                                                               | (13)      |
| Bread                                                                       | Sourdough fermented endosperm rye vs. white wheat bread | 110.6 g (sourdough); 105.9 g (white wheat bread) | Acute, randomized, controlled, crossover  | 16 healthy adults  | GCxGC-TOF-MS      | Plasma    | <p><u>Sourdough:</u></p> <ul style="list-style-type: none"> <li>• 2,4-Dihydroxybutanoic acid</li> <li>• 2-Oxo-butanoic acid</li> <li>• Alpha-ketoglutaric acid</li> <li>• Benzeneacetic acid</li> <li>• Citrate</li> <li>• Lysine</li> <li>• Methionine</li> <li>• Norvaline</li> <li>• Phenylalanine</li> <li>• Propanedioic acid</li> <li>• Ribitol</li> <li>• Threonic acid</li> </ul> <p><u>White wheat bread:</u></p> <ul style="list-style-type: none"> <li>• 2-(Z)-Butenedioic acid</li> <li>• 2,4-Dihydroxybutanoic acid</li> <li>• 2,8-Dihydroxyquinoline glucuronide</li> <li>• 2-Oxo-butanoic acid</li> <li>• Alpha-ketoglutaric acid</li> <li>• Ascorbic acid</li> <li>• Benzeneacetic acid</li> <li>• Hydrocaffeic acid</li> <li>• Lysine</li> <li>• Norleucine</li> <li>• Picolinic acid</li> <li>• Propanedioic acid</li> <li>• Succinic acid</li> </ul> | (14)      |
| Bread                                                                       | White bread vs. non-consumers                           | >1 portion/day (habitual intake)                 | Multi-centre, randomized,                 | 255 healthy adults | HPLC-QTOF-MS      | Urine     | <ul style="list-style-type: none"> <li>• 2-Aminophenol sulfate</li> <li>• 2-Hydroxy-7-methoxy-2H-1,4-benzoxazin-3-one</li> </ul>                                                                                                                                                                                                                                                                                                                                                                                                                                                                                                                                                                                                                                                                                                                                        | (15)      |

| Summary of Untargeted Studies Presenting Candidate FIBs for Fermented Foods |                                                                                                                                                                                              |                                     |                                           |                         |                   |           |                                                                                                                                                                                                                                                                                                                                                                                                                                                                                                                                                                                                                                                            |           |
|-----------------------------------------------------------------------------|----------------------------------------------------------------------------------------------------------------------------------------------------------------------------------------------|-------------------------------------|-------------------------------------------|-------------------------|-------------------|-----------|------------------------------------------------------------------------------------------------------------------------------------------------------------------------------------------------------------------------------------------------------------------------------------------------------------------------------------------------------------------------------------------------------------------------------------------------------------------------------------------------------------------------------------------------------------------------------------------------------------------------------------------------------------|-----------|
| Fermented Food                                                              | Intervention                                                                                                                                                                                 | Dose                                | Study Design                              | n                       | Analytical Method | Biosample | Candidate FIBs <sup>a</sup>                                                                                                                                                                                                                                                                                                                                                                                                                                                                                                                                                                                                                                | Reference |
|                                                                             |                                                                                                                                                                                              |                                     | controlled, parallel                      |                         |                   |           | <ul style="list-style-type: none"> <li>• 2-Hydroxy-7-methoxy-2H-1,4-benzoxazin-3-one glucuronide</li> <li>• DHPPA glucuronide</li> <li>• Hydroxybenzoic acid glucuronide</li> <li>• HPAA glucuronide</li> <li>• Riboflavin</li> </ul>                                                                                                                                                                                                                                                                                                                                                                                                                      |           |
|                                                                             | Wholegrain bread vs. non-consumers                                                                                                                                                           | >1 portion/day (habitual intake)    |                                           |                         |                   |           | <ul style="list-style-type: none"> <li>• 2,8-Dihydroxyquinoline glucuronide</li> <li>• 2-Aminophenol sulfate</li> <li>• HBOA glycoside</li> <li>• 2-Hydroxy-7-methoxy-2H-1,4-benzoxazin-3-one glucuronide</li> <li>• 2-Hydroxy-7-methoxy-2H-1,4-benzoxazin-3-one glucuronide</li> <li>• HHPAA</li> <li>• 3,5-Dihydroxyphenylethanol sulfate</li> <li>• 3-Indolecarboxylic acid glucuronide</li> <li>• DHPPA glucuronide</li> <li>• DHPPTA sulfate</li> <li>• Dihydroferulic acid sulfate</li> <li>• Enterolactone glucuronide</li> <li>• Hydroxybenzoic acid glucuronide</li> <li>• HPAA glucuronide</li> <li>• Pyrraline</li> <li>• Riboflavin</li> </ul> |           |
| Bread                                                                       | Whole grain bread replacement and high fish and bilberry consumption vs. wholegrain replacement and normal fish and berry consumption vs. avoidance of wholegrain cereals, fish, and berries | 20-25% of total daily energy intake | 12-week, randomized, controlled, parallel | 106 healthy adults      | U(H)PLC-QTOF-MS   | Plasma    | <ul style="list-style-type: none"> <li>• AR 21:1-Gln</li> <li>• AR 19:0-Gln</li> <li>• Gamma-Butyrobetaine</li> </ul> Pipecolic acid betaine                                                                                                                                                                                                                                                                                                                                                                                                                                                                                                               | (16)      |
| Bread                                                                       | Rye bread vs. wheat bread                                                                                                                                                                    | 214 g/day (rye); 179 g/day (wheat)  | 8 week, randomized, controlled, crossover | 39 postmenopausal women | GCxGC-TOF-MS      | Plasma    | <u>Rye bread:</u> <ul style="list-style-type: none"> <li>• Campesterol</li> <li>• Dodecanamide</li> <li>• Indole-3-acetic acid</li> <li>• Inosose</li> <li>• myo-Inositol</li> <li>• Ribitol</li> </ul>                                                                                                                                                                                                                                                                                                                                                                                                                                                    | (17)      |



| Summary of Untargeted Studies Presenting Candidate FIBs for Fermented Foods |                                                                       |                                       |                                           |                       |                         |           |                                                                                                                                                                                                                                                                                                                                                                                                                                                                                                                                                                       |           |
|-----------------------------------------------------------------------------|-----------------------------------------------------------------------|---------------------------------------|-------------------------------------------|-----------------------|-------------------------|-----------|-----------------------------------------------------------------------------------------------------------------------------------------------------------------------------------------------------------------------------------------------------------------------------------------------------------------------------------------------------------------------------------------------------------------------------------------------------------------------------------------------------------------------------------------------------------------------|-----------|
| Fermented Food                                                              | Intervention                                                          | Dose                                  | Study Design                              | n                     | Analytical Method       | Biosample | Candidate FIBs <sup>a</sup>                                                                                                                                                                                                                                                                                                                                                                                                                                                                                                                                           | Reference |
|                                                                             |                                                                       |                                       |                                           |                       |                         |           | <ul style="list-style-type: none"> <li>• Ribonic acid</li> <li>• Silanamine</li> <li>• Sitosterol</li> <li>• Trimethylsiloxy proline</li> </ul> <u>Wheat bread:</u> <ul style="list-style-type: none"> <li>• 1-Monooleoylglycerol trimethylsilyl ether</li> <li>• 4-[39-(Triethylsilyl)propyl]phenol</li> <li>• Butanoic acid</li> <li>• d-Erythrotetrofuranose</li> <li>• Glutamic acid</li> <li>• N-Methyl-N-(2,4,6-trimethylphenyl)formamide</li> <li>• Palmitic acid</li> <li>• Pyrrole-2,5-dione trimethylsilate</li> <li>• Tyrosine</li> <li>• Urate</li> </ul> |           |
| Bread                                                                       | Wholegrain rye vs. white wheat bread enriched with fermented rye bran | 6-10 slices/day                       | 4-week, randomized, controlled, crossover | 15 healthy adults     | U(H)PLC-QTOF-MS         | Plasma    | <ul style="list-style-type: none"> <li>• AR C17:0-glucuronide</li> <li>• AR C17:0-sulfate</li> <li>• AR C19:0-glucuronide</li> <li>• AR C19:0-sulfate</li> <li>• AR C19:1-glucuronide</li> <li>• AR C19:1-sulfate</li> <li>• AR C21:0-glucuronide</li> <li>• AR C21:1-glucuronide</li> <li>• AR C21:1-sulfate</li> <li>• AR C21:2-glucuronide</li> <li>• AR C23:2-glucuronide</li> <li>• 3,5-Dihydrobenzoic acid</li> <li>• 2-Aminophenol sulfate</li> </ul> <b>Pipecolic acid betaine</b>                                                                            | (18)      |
| Bread                                                                       | Rye bran wheat bread vs. wholegrain wheat bread                       | 196 g (rye grain); 208 g (wholegrain) | Acute crossover                           | 12 healthy volunteers | UPLC-MS/MS (untargeted) | Urine     | <ul style="list-style-type: none"> <li>• Cysteine</li> <li>• N-acetylcysteine</li> <li>• Indolelactate</li> <li>• 4-Acetamidobutanoate</li> <li>• Imidazole lactate</li> <li>• trans-4-Hydroxyproline</li> <li>• N-Acetylarginine</li> <li>• N2,N5-Diacetylnornithine</li> <li>• Argininosuccinate</li> <li>• Creatinine</li> <li>• 5-Hydroxyindoleacetate</li> <li>• Xanthurenate</li> <li>• Dopamine sulfate</li> <li>• N-Acetylputrescine</li> <li>• Cysteinyglycine</li> </ul>                                                                                    | (19)      |

| Summary of Untargeted Studies Presenting Candidate FIBs for Fermented Foods |              |      |              |          |                   |           |                                                                                                                                                                                                                                                                                                                                                                                                                                                                                                                                                                                                                                                                                                                                                                                                                                                                                                                                                                                                                                                                                                                                                                                                                                                                                                                                                                                                                                          |           |
|-----------------------------------------------------------------------------|--------------|------|--------------|----------|-------------------|-----------|------------------------------------------------------------------------------------------------------------------------------------------------------------------------------------------------------------------------------------------------------------------------------------------------------------------------------------------------------------------------------------------------------------------------------------------------------------------------------------------------------------------------------------------------------------------------------------------------------------------------------------------------------------------------------------------------------------------------------------------------------------------------------------------------------------------------------------------------------------------------------------------------------------------------------------------------------------------------------------------------------------------------------------------------------------------------------------------------------------------------------------------------------------------------------------------------------------------------------------------------------------------------------------------------------------------------------------------------------------------------------------------------------------------------------------------|-----------|
| Fermented Food                                                              | Intervention | Dose | Study Design | <i>n</i> | Analytical Method | Biosample | Candidate FIBs <sup>a</sup>                                                                                                                                                                                                                                                                                                                                                                                                                                                                                                                                                                                                                                                                                                                                                                                                                                                                                                                                                                                                                                                                                                                                                                                                                                                                                                                                                                                                              | Reference |
|                                                                             |              |      |              |          |                   |           | <ul style="list-style-type: none"> <li>• Phenylacetylglutamine</li> <li>• Citramalate</li> <li>• Pseudouridine</li> <li>• 4-Ureidobutyrate</li> <li>• Uridine</li> <li>• 5,6-Dihydrouracil</li> <li>• Thymine</li> <li>• 3-Methylcytidine</li> <li>• 7-Methylguanine</li> <li>• N2,N2-Dimethylguanosine</li> <li>• N1-Methyladenosine</li> <li>• N6-Carbamoylthreonyladenosine</li> <li>• Adenosine</li> <li>• Adenine</li> <li>• Urate</li> <li>• Azelate</li> <li>• Pimelate</li> <li>• Dimethylmalonic acid</li> <li>• 2-Aminooctanoate</li> <li>• Ribitol</li> <li>• Ribulose/xylulose</li> <li>• N1-Methyl-2-pyridone-5-carboxamide</li> <li>• 1-Methylnicotinamide</li> <li>• Oxalate</li> <li>• Citraconate/glutaconate</li> <li>• <b>Tartarate</b></li> <li>• <b>Vanillic acid</b></li> <li>• <b>3,5-DHBA</b></li> <li>• <b>Ferulic acid 4-sulfate</b></li> <li>• <b>Syringic acid</b></li> <li>• <b>2,3-Dihydroxyisovalerate</b></li> <li>• <b>2-Oxindole-3-acetate</b></li> <li>• <b>Gentisic acid-5-glucoside</b></li> <li>• <b>4-Vinylguaiacol sulfate</b></li> <li>• <b>1,2,3-Benzenetriol sulfate</b></li> <li>• <b>3-Hydroxypyridine sulfate</b></li> <li>• <b>1,2,3-Benzenetriol sulfate</b></li> <li>• Lanthionine</li> <li>• Sulfate</li> <li>• HPAA sulfate</li> <li>• 4-Acetylphenol sulfate</li> <li>• 3-Methylcatechol sulfate</li> <li>• 3-Methylcatechol sulfate</li> <li>• 3-Methoxycatechol sulfate</li> </ul> |           |

| Summary of Untargeted Studies Presenting Candidate FIBs for Fermented Foods |                                                                                                                                                                                    |                                                                  |                              |                       |                       |           |                                                                                                                                                                                                                                                                                                                                                                                                                                                                                                                                                                                                                                                                                                                                                                                                                                                                                                                                                                                     |           |
|-----------------------------------------------------------------------------|------------------------------------------------------------------------------------------------------------------------------------------------------------------------------------|------------------------------------------------------------------|------------------------------|-----------------------|-----------------------|-----------|-------------------------------------------------------------------------------------------------------------------------------------------------------------------------------------------------------------------------------------------------------------------------------------------------------------------------------------------------------------------------------------------------------------------------------------------------------------------------------------------------------------------------------------------------------------------------------------------------------------------------------------------------------------------------------------------------------------------------------------------------------------------------------------------------------------------------------------------------------------------------------------------------------------------------------------------------------------------------------------|-----------|
| Fermented Food                                                              | Intervention                                                                                                                                                                       | Dose                                                             | Study Design                 | <i>n</i>              | Analytical Method     | Biosample | Candidate FIBs <sup>a</sup>                                                                                                                                                                                                                                                                                                                                                                                                                                                                                                                                                                                                                                                                                                                                                                                                                                                                                                                                                         | Reference |
|                                                                             |                                                                                                                                                                                    |                                                                  |                              |                       | HPLC-MS/MS (Targeted) |           | <ul style="list-style-type: none"> <li>• 1-Methylxanthine</li> <li>• 1-Methylurate</li> <li>• 3,5-DHBA</li> <li>• 3,5-DHPPTA</li> <li>• 3,5-DHBA glycine</li> <li>• 3,5-DHBA sulfate</li> <li>• 3,5-DHPPA sulfate</li> <li>• 3,5-DHPPTA sulfate</li> <li>• 3,5-DHPHTA sulfate</li> <li>• 2-(3,5-dihydroxyphenyl)ethanol sulfate</li> <li>• HPAA</li> <li>• HPAA sulfate</li> <li>• 2-Aminophenol sulfate</li> <li>• HHPAA sulfate</li> <li>• HHPPA sulfate</li> <li>• Isopropyl 2hydroxyphenylcarbamate</li> <li>• Ferulic acid sulfate</li> <li>• Caffeic acid sulfate</li> <li>• Vanillic acid sulfate</li> <li>• Homovanillic acid sulfate</li> <li>• DHFA sulfate</li> <li>• Feruloyglycine</li> <li>• Feruloyglycine sulfate</li> <li>• Glycochenodeoxycholic acid</li> <li>• Glycochenodeoxychol-5en-24-oic acid</li> <li>• Glycochenodeoxycholic acid glucuronide</li> <li>• Glycochenodeoxychol-5en-24-oic acid glucuronide</li> <li>• Enterolactone glucuronide</li> </ul> |           |
| Bread                                                                       | Wholegrain sourdough bread vs. white wheat bread enriched with native unprocessed rye bran vs. white wheat bread enriched with bioprocessed rye bran vs. white wheat bread control | 109 to 166 g (standardised to 50 g carbohydrates and 20 g fiber) | Acute, randomized, crossover | 12 healthy volunteers | LC-QTOF-MS and MS/MS  | Plasma    | <ul style="list-style-type: none"> <li>• Benzoxazinoid-derived phenylacetamide sulfates (hydroxy-N-(2-hydroxyphenyl) acetamine, and N-(2-hydroxyphenyl) acetamide)</li> </ul> <p>(Fermentation has a central role in modulating the phytochemical profile of the breads)</p>                                                                                                                                                                                                                                                                                                                                                                                                                                                                                                                                                                                                                                                                                                        | (20)      |

| Summary of Untargeted Studies Presenting Candidate FIBs for Fermented Foods |                                                |                                                                                     |                                  |                                                        |                   |           |                                                                                                                                                                                                                                                                                                                                                                                                                                                                                                                                                                                                                                                                                                                                                                                                                                                                                                                                                                                                                                                                                                                                          |           |
|-----------------------------------------------------------------------------|------------------------------------------------|-------------------------------------------------------------------------------------|----------------------------------|--------------------------------------------------------|-------------------|-----------|------------------------------------------------------------------------------------------------------------------------------------------------------------------------------------------------------------------------------------------------------------------------------------------------------------------------------------------------------------------------------------------------------------------------------------------------------------------------------------------------------------------------------------------------------------------------------------------------------------------------------------------------------------------------------------------------------------------------------------------------------------------------------------------------------------------------------------------------------------------------------------------------------------------------------------------------------------------------------------------------------------------------------------------------------------------------------------------------------------------------------------------|-----------|
| Fermented Food                                                              | Intervention                                   | Dose                                                                                | Study Design                     | n                                                      | Analytical Method | Biosample | Candidate FIBs <sup>a</sup>                                                                                                                                                                                                                                                                                                                                                                                                                                                                                                                                                                                                                                                                                                                                                                                                                                                                                                                                                                                                                                                                                                              | Reference |
| Bread                                                                       | Wholegrain bread vs. wholemeal rye bread       | Advised to take test products instead of customarily used breads and baked products | 4-week, randomized, crossover    | 20 volunteers with slightly elevated serum cholesterol | UPLC-QTOF-MS      | Urine     | <ul style="list-style-type: none"> <li>• 3,5-Dihydroxyhydrocinamic acid sulfate</li> <li>• Non-identified nitrogen containing metabolite</li> <li>• Ascorbic acid</li> <li>• Non-identified nitrogen containing metabolite</li> <li>• 2-Aminophenol sulfate</li> <li>• Non-identified nitrogen containing metabolite</li> <li>• Nonanedioic acid</li> <li>• DHPPA glucuronide</li> <li>• Indolylacryloylglycine</li> <li>• Enterolactone glucuronide</li> <li>• DHPPA sulfate</li> <li>• Non-identified nitrogen containing metabolite</li> <li>• Ferulic acid-4-O-sulfate</li> <li>• 2,4-Dihydroxy-1,4-benzoxazin3-one sulfate</li> <li>• 3,5-Dihydroxyphenylethanol sulfate</li> <li>• 1,3,4,5Tetrahydroxycyclohexane-1carboxylic acid</li> </ul>                                                                                                                                                                                                                                                                                                                                                                                      | (21)      |
| Coffee                                                                      | Coffee, lower intake vs. Coffee, higher intake | 4 cups/day (600 mL/day) lower intake; 8 cups/day (1200mL/day) higher intake         | 1-month, single-blind, crossover | 47 healthy adults                                      | U(H)PLC-ESI-MS/MS | Serum     | <p><u>Lower intake:</u></p> <ul style="list-style-type: none"> <li>• <b>Creatinine</b></li> <li>• <b>Guanidinoacetate</b></li> <li>• <b>Imidazole lactate</b></li> <li>• <b>Isovalerylcarnitine</b></li> <li>• <b>Cysteine</b></li> <li>• <b>4-Acetamidobutanoate</b></li> <li>• <b>N-acetylputrescine</b></li> <li>• <b>Indole-3-lactic acid</b></li> <li>• <b>Kynurenine</b></li> <li>• <b>2-Hydroxyphenylacetate</b></li> <li>• <b>Glucuronate</b></li> <li>• <b>Trigonelline</b></li> <li>• <b>Citraconate/glutaconate</b></li> <li>• <b>4-Androsten-3beta,17beta-diol monosulfate</b></li> <li>• <b>Epiandrosterone sulfate</b></li> <li>• <b>Etiocolanolone glucuronide</b></li> <li>• <b>Urate</b></li> <li>• <b>7-Methylguanine</b></li> <li>• <b>N-acetylcarnosine</b></li> <li>• <b>DSGEGDFXAEGGGVR*</b></li> <li>• <b>3-(3-hydroxyphenyl) propionate</b></li> <li>• <b>3-(3-hydroxyphenyl) propionate sulfate</b></li> <li>• <b>3-Hydroxyhippurate</b></li> <li>• <b>3-Methyl catechol sulfate</b></li> <li>• <b>3-Phenylpropionate</b></li> <li>• <b>4-Vinylphenol sulfate</b></li> <li>• <b>Catechol sulfate</b></li> </ul> | (22)      |

| Summary of Untargeted Studies Presenting Candidate FIBs for Fermented Foods |              |      |              |          |                   |           |                                                                                                                                                                                                                                                                                                                                                                                                                                                                                                                                                                                                                                                                                                                                                                                                                                                                                                                                                                                                                                                                                                                                                                                                                                                                                                                                        |           |
|-----------------------------------------------------------------------------|--------------|------|--------------|----------|-------------------|-----------|----------------------------------------------------------------------------------------------------------------------------------------------------------------------------------------------------------------------------------------------------------------------------------------------------------------------------------------------------------------------------------------------------------------------------------------------------------------------------------------------------------------------------------------------------------------------------------------------------------------------------------------------------------------------------------------------------------------------------------------------------------------------------------------------------------------------------------------------------------------------------------------------------------------------------------------------------------------------------------------------------------------------------------------------------------------------------------------------------------------------------------------------------------------------------------------------------------------------------------------------------------------------------------------------------------------------------------------|-----------|
| Fermented Food                                                              | Intervention | Dose | Study Design | <i>n</i> | Analytical Method | Biosample | Candidate FIBs <sup>a</sup>                                                                                                                                                                                                                                                                                                                                                                                                                                                                                                                                                                                                                                                                                                                                                                                                                                                                                                                                                                                                                                                                                                                                                                                                                                                                                                            | Reference |
|                                                                             |              |      |              |          |                   |           | <ul style="list-style-type: none"> <li>• Hippurate</li> <li>• O-methylcatechol sulfate</li> <li>• 3-Hydroxypyridine sulfate</li> <li>• N-methylpipercolate</li> <li>• Cinnamoylglycine</li> <li>• Dihydroferulic acid</li> <li>• Homostachydrine</li> <li>• N-(2-furoyl)glycine</li> <li>• Pyrrolidine</li> <li>• Quinate</li> <li>• 1,3,7-Trimethylurate</li> <li>• 1,3-Dimethylurate</li> <li>• 1,7-Dimethylurate</li> <li>• 1-Methylurate</li> <li>• 1-Methylxanthine</li> <li>• 3,7-Dimethylurate</li> <li>• 3-Methylxanthine</li> <li>• AAMU</li> <li>• 7-Methylxanthine</li> <li>• Caffeic acid sulfate</li> <li>• Caffeine</li> <li>• Paraxanthine</li> <li>• Theobromine</li> <li>• Theophylline</li> <li>• <u>Higher intake:</u></li> <li>• Creatinine</li> <li>• Guanidinoacetate</li> <li>• Imidazole lactate</li> <li>• Isovalerylcarnitine</li> <li>• Cysteine</li> <li>• 4-Acetamidobutanoate</li> <li>• N-acetylputrescine</li> <li>• Indole-3-lactic acid</li> <li>• Kynurenine</li> <li>• 2-Hydroxyphenylacetate</li> <li>• Glucuronate</li> <li>• Trigonelline</li> <li>• Citraconate/glutaconate</li> <li>• 4-Androsten-3beta,17beta-diol monosulfate</li> <li>• Epiandrosterone sulfate</li> <li>• Etiocholanolone glucuronide</li> <li>• Urate</li> <li>• 7-Methylguanine</li> <li>• N-acetylcarnosine</li> </ul> |           |

| Summary of Untargeted Studies Presenting Candidate FIBs for Fermented Foods |                                                     |                                               |                     |                    |                   |           |                                                                                                                                                                                                                                                                                                                                                                                                                                                                                                                                                                                                                                                                                                                                                                                                                                                                                                                                                                                                                                                                                                                                       |           |
|-----------------------------------------------------------------------------|-----------------------------------------------------|-----------------------------------------------|---------------------|--------------------|-------------------|-----------|---------------------------------------------------------------------------------------------------------------------------------------------------------------------------------------------------------------------------------------------------------------------------------------------------------------------------------------------------------------------------------------------------------------------------------------------------------------------------------------------------------------------------------------------------------------------------------------------------------------------------------------------------------------------------------------------------------------------------------------------------------------------------------------------------------------------------------------------------------------------------------------------------------------------------------------------------------------------------------------------------------------------------------------------------------------------------------------------------------------------------------------|-----------|
| Fermented Food                                                              | Intervention                                        | Dose                                          | Study Design        | <i>n</i>           | Analytical Method | Biosample | Candidate FIBs <sup>a</sup>                                                                                                                                                                                                                                                                                                                                                                                                                                                                                                                                                                                                                                                                                                                                                                                                                                                                                                                                                                                                                                                                                                           | Reference |
|                                                                             |                                                     |                                               |                     |                    |                   |           | <ul style="list-style-type: none"> <li>• DSGEGDFXAEGGGVR</li> <li>• 3-(3-hydroxyphenyl) propionate</li> <li>• 3-(3-hydroxyphenyl) propionate sulfate</li> <li>• 3-Hydroxyhippurate</li> <li>• 3-Methyl catechol sulfate</li> <li>• 3-Phenylpropionate</li> <li>• 4-Vinylphenol sulfate</li> <li>• Catechol sulfate</li> <li>• Hippurate</li> <li>• O-methylcatechol sulfate</li> <li>• 3-Hydroxypyridine sulfate</li> <li>• N-methylpipercolate</li> <li>• Cinnamoylglycine</li> <li>• Dihydroferulic acid</li> <li>• Homostachydrine</li> <li>• N-(2-furoyl)glycine</li> <li>• Pyrraline</li> <li>• Quinate</li> <li>• 1,3,7-Trimethylurate</li> <li>• 1,3-Dimethylurate</li> <li>• 1,7-Dimethylurate</li> <li>• 1-Methylurate</li> <li>• 1-Methylxanthine</li> <li>• 3,7-Dimethylurate</li> <li>• 3-Methylxanthine</li> <li>• AAMU</li> <li>• 7-Methylxanthine</li> <li>• Caffeic acid sulfate</li> <li>• Caffeine</li> <li>• Paraxanthine</li> <li>• Theobromine</li> <li>• Theophylline</li> <li>• Campesterol</li> <li>• N6-carbamoylthreonyladenosine</li> <li>• Palmitoyl dihydrosphingomyelin</li> <li>• Phosphate</li> </ul> |           |
| Coffee                                                                      | Coffee, high consumption vs. coffee low consumption | 1546 g/day (high); 337 g/day (low) (from FFQ) | Nested case-control | 489 healthy adults | LC-MS and GC-MS   | Serum     | <ul style="list-style-type: none"> <li>• 1,3,7-Trimethylurate</li> <li>• 1,7-Dimethylurate</li> <li>• 1-Methylurate</li> <li>• 1-Methylxanthine</li> <li>• 3-(3-hydroxyphenyl) propionate</li> <li>• 3-Hydroxyhippurate</li> <li>• 4-Vinylphenol sulfate</li> <li>• Caffeine</li> </ul>                                                                                                                                                                                                                                                                                                                                                                                                                                                                                                                                                                                                                                                                                                                                                                                                                                               | (23)      |

| Summary of Untargeted Studies Presenting Candidate FIBs for Fermented Foods |                 |        |                                          |                  |                      |           |                                                                                                                                                                                                                                                                                                                                                                                                                                                                                                                                                                                                                                                             |           |
|-----------------------------------------------------------------------------|-----------------|--------|------------------------------------------|------------------|----------------------|-----------|-------------------------------------------------------------------------------------------------------------------------------------------------------------------------------------------------------------------------------------------------------------------------------------------------------------------------------------------------------------------------------------------------------------------------------------------------------------------------------------------------------------------------------------------------------------------------------------------------------------------------------------------------------------|-----------|
| Fermented Food                                                              | Intervention    | Dose   | Study Design                             | <i>n</i>         | Analytical Method    | Biosample | Candidate FIBs <sup>a</sup>                                                                                                                                                                                                                                                                                                                                                                                                                                                                                                                                                                                                                                 | Reference |
|                                                                             |                 |        |                                          |                  |                      |           | <ul style="list-style-type: none"> <li>• Catechol sulfate</li> <li>• Cinnamoylglycine</li> <li>• Cyclo(leu-pro)</li> <li>• N-(2-furoyl)glycine</li> <li>• Paraxanthine</li> <li>• Quinate</li> <li>• Theobromine</li> <li>• Theophylline</li> <li>• Trigonelline</li> </ul>                                                                                                                                                                                                                                                                                                                                                                                 |           |
| Coffee                                                                      | Coffee          | 200 mL | Acute intervention                       | 8 healthy adults | NMR                  | Urine     | <ul style="list-style-type: none"> <li>• 2-Furoylglycine</li> <li>• N-methylpyridinium</li> </ul>                                                                                                                                                                                                                                                                                                                                                                                                                                                                                                                                                           | (24)      |
| Coffee                                                                      | Coffee          | 350 mL | Acute intervention                       | 9 healthy adults | HILIC-U(H)PLC-TOF-MS | Urine     | <ul style="list-style-type: none"> <li>• N-methylpyridinium</li> <li>• Trigonelline</li> <li>• 1,3- or 1,7-dimethyluric acid</li> <li>• 3-Methylxanthine</li> <li>• 7-Methylxanthine</li> <li>• Caffeine</li> <li>• Catechol sulfate</li> <li>• Dihydrocaffeic acid sulfate</li> <li>• Dihydroferulic acid</li> <li>• Dihydroferulic acid glucuronide</li> <li>• Dihydroferulic acid sulfate</li> <li>• Ferulic acid</li> <li>• Ferulic acid glucuronide</li> <li>• Ferulic acid sulfate</li> <li>• Guaiacol sulfate</li> <li>• N-feruloylglycine</li> <li>• Paraxanthine</li> <li>• Theobromine</li> <li>• Theophylline</li> <li>• Trigonelline</li> </ul> | (25)      |
| Coffee                                                                      | Coffee, instant | 400 mL | Acute, randomized, controlled, crossover | 9 healthy adults | U(H)PLC-MS           | Plasma    | <ul style="list-style-type: none"> <li>• 4-Feruloylquinic acid</li> <li>• 4-Feruloylquinic acid lactone</li> <li>• Caffeic acid 3-O-sulfate</li> <li>• Caffeic acid 4-O-sulfate</li> <li>• Caffeoylquinic acid lactone O-sulfates</li> <li>• Dihydrocaffeic acid</li> <li>• Dihydrocaffeic acid 3-O-glucuronide</li> <li>• Dihydrocaffeic acid 3-O-sulfate</li> <li>• Dihydrocaffeic acid 4-O-sulfate</li> <li>• Dihydrodihydrodimethoxycinnamic acid</li> <li>• Dihydroferulic acid</li> <li>• Dihydroferulic acid 4-O-sulfate</li> <li>• Dihydroisoferulic acid</li> </ul>                                                                                | (26)      |

| Summary of Untargeted Studies Presenting Candidate FIBs for Fermented Foods |                                                    |                                                                           |                               |                                                         |                     |           |                                                                                                                                                                                                                                                                                                                                                                                                                                                                                                                                                                                                                                                                                                         |           |
|-----------------------------------------------------------------------------|----------------------------------------------------|---------------------------------------------------------------------------|-------------------------------|---------------------------------------------------------|---------------------|-----------|---------------------------------------------------------------------------------------------------------------------------------------------------------------------------------------------------------------------------------------------------------------------------------------------------------------------------------------------------------------------------------------------------------------------------------------------------------------------------------------------------------------------------------------------------------------------------------------------------------------------------------------------------------------------------------------------------------|-----------|
| Fermented Food                                                              | Intervention                                       | Dose                                                                      | Study Design                  | <i>n</i>                                                | Analytical Method   | Biosample | Candidate FIBs <sup>a</sup>                                                                                                                                                                                                                                                                                                                                                                                                                                                                                                                                                                                                                                                                             | Reference |
|                                                                             |                                                    |                                                                           |                               |                                                         |                     |           | <ul style="list-style-type: none"> <li>• Dihydroisoferulic acid 3-O-sulfate</li> <li>• Dihydroisoferulic acid O-glucuronide</li> <li>• Dimethoxycinnamic acid</li> <li>• Ferulic acid</li> <li>• (iso)Ferulic acid</li> <li>• (iso)Ferulic acid 3-O-glucuronide</li> <li>• (iso)Ferulic acid 3-O-sulfate</li> <li>• Ferulic acid 4-O-glucuronide</li> <li>• Ferulic acid 4-O-sulfate</li> <li>• 3-Feruloylquinic acid</li> <li>• 5-Feruloylquinic acid</li> <li>• 3-Feruloylquinic acid lactone</li> <li>• Feruloylquinic acid lactone O-glucuronide</li> <li>• Feruloylquinic acid lactone O-sulfate</li> <li>• m-CoA O-sulfate</li> <li>• o-CoA O-sulfate</li> <li>• p-DHCoAO-sulfate</li> </ul>      |           |
| Coffee                                                                      | High coffee consumption vs. low coffee consumption | 183 to 540 mL/day (high); 0 mL/day (low) (from FFQ, multiple 24h recalls) | Prospective cohort            | 39 healthy adults (20 high consumers; 19 low consumers) | U(H)PLC-QTOF-MS     | Urine     | <ul style="list-style-type: none"> <li>• <b>1,3- or 3,7-Dimethyluric acid</b></li> <li>• <b>1,7-Dimethyluric acid</b></li> <li>• <b>1-Methyluric acid</b></li> <li>• <b>1-Methylxanthine</b></li> <li>• <b>3-Hydroxyhippuric acid</b></li> <li>• <b>AFMU</b></li> <li>• <b>Atractyligenin glucuronide</b></li> <li>• <b>Caffeine</b></li> <li>• <b>Cyclo(isoleucyl-prolyl)</b></li> <li>• <b>Dimethylxanthine (paraxanthine or theophylline) glucuronide</b></li> <li>• <b>Hippurate</b></li> <li>• <b>Kahweol oxide glucuronide</b></li> <li>• <b>Kahweol oxide glucuronide analogue</b></li> <li>• <b>Paraxanthine</b></li> <li>• <b>Trigonelline</b></li> <li>• <b>Trimethyluric acid</b></li> </ul> | (27)      |
| Coffee                                                                      | Coffee                                             | 4 cups/day; 8 cups/day                                                    | 1-month controlled, crossover | 47 healthy adults, habitual coffee drinkers             | IMS-MS (lipidomics) | Serum     | <p><u>Low-dose:</u></p> <ul style="list-style-type: none"> <li>• TAG47:1-FA17:0</li> <li>• TAG52:5-FA20:5</li> <li>• PC(18:0/16:1)</li> <li>• PC(18:0/18:3)</li> <li>• PC(18:0/20:2)</li> <li>• PE(O-16:0/18:2)</li> <li>• PE(P-16:0/18:2)</li> <li>• PE(P-18:0/18:2)</li> <li>• DCER(24:0)</li> </ul>                                                                                                                                                                                                                                                                                                                                                                                                  | (28)      |



| Summary of Untargeted Studies Presenting Candidate FIBs for Fermented Foods |                                    |                                                                                      |                                             |                                                                   |                                             |           |                                                                                                                                                                                                                                                                                                                                                                                                                                |           |
|-----------------------------------------------------------------------------|------------------------------------|--------------------------------------------------------------------------------------|---------------------------------------------|-------------------------------------------------------------------|---------------------------------------------|-----------|--------------------------------------------------------------------------------------------------------------------------------------------------------------------------------------------------------------------------------------------------------------------------------------------------------------------------------------------------------------------------------------------------------------------------------|-----------|
| Fermented Food                                                              | Intervention                       | Dose                                                                                 | Study Design                                | n                                                                 | Analytical Method                           | Biosample | Candidate FIBs <sup>a</sup>                                                                                                                                                                                                                                                                                                                                                                                                    | Reference |
|                                                                             |                                    |                                                                                      |                                             |                                                                   |                                             |           | <u>High-dose:</u> <ul style="list-style-type: none"> <li>• TAG47:1-FA17:0</li> <li>• TAG52:5-FA20:5</li> <li>• TAG60:11-FA22:5</li> <li>• PC(18:0/16:1)</li> <li>• PC(18:0/18:3)</li> <li>• PC(18:0/20:2)</li> <li>• PC(18:0/20:3)</li> <li>• PE(18:0/20:1)</li> <li>• PE(O-16:0/18:2)</li> <li>• PE(O-18:0/20:3)</li> <li>• PE(P-16:0/18:2)</li> <li>• PE(P-18:0/18:2)</li> <li>• DCER(24:0)</li> <li>• LCER(26:1)</li> </ul> |           |
| Coffee                                                                      | Coffee consumers vs. non-consumers | Consumers (mean 506.4 g/day for women, 526.4 g/day for men); Non-consumers (0 g/day) | Cross-sectional, KarMeN study               | 48 healthy adults (consumers); 49 healthy adults (non-consumers)  | HS-SPME-GCxGC-MS                            | Urine     | <ul style="list-style-type: none"> <li>• 3,4-Dimethyl-2,5-furadione</li> <li>• 2-Methyl-furan</li> <li>• Guaiacol</li> <li>• 2-Methyl-butanoic acid</li> <li>• 3-Methyl-butanoic acid</li> <li>• 2-Vinylfuran</li> </ul>                                                                                                                                                                                                       | (29)      |
| Coffee                                                                      | Total coffee                       | Consumers (≥50 mL/day)                                                               | Cross-sectional, PREDIMED study             | 1379 adults with T2D or CV risk factors; 285 non-coffee consumers | LC-MS/MS, U(H)PLC-Exactive Plus orbitrap MS | Plasma    | <ul style="list-style-type: none"> <li>• Sphingomyelin (C24:0)</li> <li>• Caffeine</li> <li>• AAMU</li> <li>• Cotinine</li> </ul>                                                                                                                                                                                                                                                                                              | (30)      |
|                                                                             | Caffeinated coffee                 | Consumers (≥50 mL/day)                                                               |                                             | 512 adults with T2D or CV risk factors                            |                                             |           | <ul style="list-style-type: none"> <li>• Sphingomyelin (C24:0)</li> <li>• Caffeine</li> <li>• AAMU</li> <li>• Cotinine</li> </ul>                                                                                                                                                                                                                                                                                              |           |
|                                                                             | Decaffeinated coffee               | Consumers (≥50 mL/day)                                                               |                                             | 721 adults with T2D or CV risk factors                            |                                             |           | <ul style="list-style-type: none"> <li>• Alpha-glycerophosphate</li> <li>• Hydroxyhippurate</li> <li>• Hippurate</li> <li>• Sphingomyelin (C24:0)</li> <li>• Phosphatidylcholine (C40:6)</li> </ul>                                                                                                                                                                                                                            |           |
| Coffee                                                                      | Habitual coffee intake             | 253 mL/day (France); 437 mL/day (Germany); 154 mL/day (Greece); 99 mL/day (Italy)    | EPIC study (France, Germany, Italy, Greece) | 451 participants from the EPIC cohort                             | U(H)PLC-MS/MS                               | Serum     | <ul style="list-style-type: none"> <li>• Trigonelline</li> <li>• Caffeine</li> <li>• Paraxanthine</li> <li>• AAMU</li> <li>• Quinic acid</li> <li>• Cyclo(prolyl)-valyl</li> <li>• Cyclo(isoleucyl)-prolyl</li> <li>• Cyclo(leucyl)-prolyl</li> </ul>                                                                                                                                                                          | (31)      |

| Summary of Untargeted Studies Presenting Candidate FIBs for Fermented Foods |                                                           |                                                                                       |                     |                                                              |                       |           |                                                                                                                                                                                                                                                                                                                                                                                                                                                                                                                                                              |           |
|-----------------------------------------------------------------------------|-----------------------------------------------------------|---------------------------------------------------------------------------------------|---------------------|--------------------------------------------------------------|-----------------------|-----------|--------------------------------------------------------------------------------------------------------------------------------------------------------------------------------------------------------------------------------------------------------------------------------------------------------------------------------------------------------------------------------------------------------------------------------------------------------------------------------------------------------------------------------------------------------------|-----------|
| Fermented Food                                                              | Intervention                                              | Dose                                                                                  | Study Design        | n                                                            | Analytical Method     | Biosample | Candidate FIBs <sup>a</sup>                                                                                                                                                                                                                                                                                                                                                                                                                                                                                                                                  | Reference |
| Coffee, multiple foods                                                      | Habitual intake of 58 different foods based on FFQ        | <1X/week, 1X/week, 2-4X/week, 5-6X/week, 1X/day, >1X/day                              | Prospective cohort  | 68 volunteers from the GrainMark cohort (FFQ)                | FIE-MS                | Urine     | <ul style="list-style-type: none"> <li>• <b>Pyrocatechol sulfate</b></li> <li>• Dihydrocaffeic acid, hippuric acid, caffeic acid for coffee intake</li> <li>• Metabolites from other foods, including cheese, chocolate, wine, beer, and other alcoholic beverages were not reported</li> </ul>                                                                                                                                                                                                                                                              | (32)      |
| Coffee                                                                      | Habitual coffee consumption                               | Frequency of coffee consumption and number of 250 mL cups each consumption (from FFQ) | Association study   | 564 healthy volunteers from the Hong Kong Osteoporosis Study | LC-MS (Untargeted)    | Serum     | <ul style="list-style-type: none"> <li>• <b>Quinate</b></li> <li>• <b>3-Hydroxypyridine sulfate</b></li> <li>• <b>Trigonelline</b></li> <li>• <b>AFMU</b></li> <li>• <b>AAMU</b></li> <li>• <b>1-Methylxanthine</b></li> <li>• <b>Paraxanthine</b></li> <li>• <b>3-Methyl catechol sulfate</b></li> <li>• <b>1-Methylurate</b></li> <li>• <b>1,7-Dimethylurate</b></li> <li>• <b>3-Hydroxyhippurate</b></li> </ul>                                                                                                                                           | (33)      |
| Coffee                                                                      | Coffee intake                                             | Frequency of coffee consumption (from FFQ)                                            | Association study   | 1595 women from the Nurses Health Study I and II             | LC-MS/MS (Untargeted) | Plasma    | <ul style="list-style-type: none"> <li>• <b>Trigonelline</b></li> <li>• <b>AAMU</b></li> <li>• <b>Cinnamoylglycine</b></li> <li>• <b>1,7-Dimethyluric acid</b></li> <li>• <b>Caffeine</b></li> <li>• <b>Phenyllactic acid</b></li> <li>• <b>4-Hydroxyhippuric acid</b></li> <li>• <b>Cytosine</b></li> <li>• <b>7-Methylxanthine</b></li> <li>• <b>L-carnitine</b></li> <li>• <b>C20:4 cholesterol ester</b></li> <li>• <b>C18:1 cholesterol ester</b></li> <li>• <b>C18:2 cholesterol ester</b></li> </ul>                                                  | (34)      |
| Coffee                                                                      | Habitual coffee intake, boiled and filtered coffee intake | Frequency of coffee intake (including boiled and filtered) (from FFQ)                 | Nested case-control | 421 case-control pairs and 129 at 10-year follow-up          | LC-MS (Untargeted)    | Plasma    | <p><u>Filtered coffee:</u></p> <ul style="list-style-type: none"> <li>• <b>1-Methyluric acid</b></li> <li>• <b>Quinic acid</b></li> <li>• <b>Theobromine</b></li> <li>• <b>2-Furoylglycine</b></li> <li>• <b>AAMU</b></li> <li>• <b>Cyclo(leucyl-prolyl)</b></li> <li>• <b>7-hydroxy-4(methoxymethyl)coumarin</b></li> </ul> <p><u>Boiled coffee:</u></p> <ul style="list-style-type: none"> <li>• <b>LysoPE(20:4)</b></li> <li>• <b>PE(20:4/16:0)</b></li> </ul> <p><u>General:</u></p> <ul style="list-style-type: none"> <li>• <b>Caffeine</b></li> </ul> | (35)      |

| Summary of Untargeted Studies Presenting Candidate FIBs for Fermented Foods |                          |            |                                          |                                       |                   |           |                                                                                                                                                                                                                                                                                                                                                                                                                                                                                                                                                                                                                                                                                                                                                                                                                                                                                                                                                                                                                                                                                                                                                              |           |
|-----------------------------------------------------------------------------|--------------------------|------------|------------------------------------------|---------------------------------------|-------------------|-----------|--------------------------------------------------------------------------------------------------------------------------------------------------------------------------------------------------------------------------------------------------------------------------------------------------------------------------------------------------------------------------------------------------------------------------------------------------------------------------------------------------------------------------------------------------------------------------------------------------------------------------------------------------------------------------------------------------------------------------------------------------------------------------------------------------------------------------------------------------------------------------------------------------------------------------------------------------------------------------------------------------------------------------------------------------------------------------------------------------------------------------------------------------------------|-----------|
| Fermented Food                                                              | Intervention             | Dose       | Study Design                             | <i>n</i>                              | Analytical Method | Biosample | Candidate FIBs <sup>a</sup>                                                                                                                                                                                                                                                                                                                                                                                                                                                                                                                                                                                                                                                                                                                                                                                                                                                                                                                                                                                                                                                                                                                                  | Reference |
|                                                                             |                          |            |                                          |                                       |                   |           | <ul style="list-style-type: none"> <li>• Paraxanthine</li> <li>• Theophylline</li> <li>• Trigonelline</li> <li>• Atractyligenin glucuronide</li> <li>• Ethyl 3-mercaptopropanoic acid</li> <li>• LysoPC(24:0)</li> <li>• LysoPE(22:4)</li> <li>• LysoPE(22:5)</li> <li>• LysoPE(24:0)</li> <li>• N-Methylpyridinium</li> <li>• Sinapic acid</li> <li>• Dihydroferulic acid 4-sulphate</li> </ul>                                                                                                                                                                                                                                                                                                                                                                                                                                                                                                                                                                                                                                                                                                                                                             |           |
| Wine                                                                        | Red wine vs. no red wine | 250 mL/day | 4-week, randomized, controlled, parallel | 33 healthy adults; 8 in control group | U(H)PLC-TOF-MS    | Urine     | <ul style="list-style-type: none"> <li>• (3S,5R,6S,7E,9x)-7-megastigmene-3,6,9-triol 9-glucoside</li> <li>• (E)-2-propenyl [3-(2-propenylthio)-2-propenyl] sulfate</li> <li>• 1-(2,3-dihydro-1H-pyrrolizin-5-yl)-2-propen-1-one</li> <li>• 2,3-Dihydroxy-3-methylvaleric acid</li> <li>• 2,3-Dihydroxyvaleric acid</li> <li>• 2,3-Dihydroxyvaleric acid</li> <li>• 2,3-Dimethyl-3-hydroxyglutaric acid</li> <li>• 2-Isopropyl-3-oxosuccinate</li> <li>• 3-Carboxy-4-methyl-5-pentyl-2-furanpropanoic acid</li> <li>• 3-Methoxy-4-hydroxyphenylglycol sulfate</li> <li>• 3-Methylcrotonylglycine</li> <li>• 4',6'-Dihydroxy-2'-methoxyacetophenone 6'-glucoside</li> <li>• 4-Chloro-3-[(2-chloro-5-nitrobenzoyl)carbamothioylamino]benzoic acid</li> <li>• 4-Hydroxy-5-(dihydroxyphenyl) valeric acid-O-sulfate</li> <li>• 4-Hydroxy-5-(phenyl) valeric acid-O-glucuronide</li> <li>• 4-Hydroxy-5-(phenyl) valeric acid-O-sulfate</li> <li>• 5-(1-propynyl)-5-vinyl-2,2-bithiophene</li> <li>• DHPV sulfate</li> <li>• 5,7-dihydroxy-3',4'-dimethoxy-5'-prenylflavanone</li> <li>• 5-Methoxybilobetin</li> <li>• AFMU</li> <li>• Aurantricholide B</li> </ul> | (36)      |

| Summary of Untargeted Studies Presenting Candidate FIBs for Fermented Foods |              |      |              |          |                   |           |                                                                                                                                                                                                                                                                                                                                                                                                                                                                                                                                                                                                                                                                                                                                                                                                                                                                                                                                                                                                                                                                                                                                                                                                                                                                                                                                                                                                                                                                             |           |
|-----------------------------------------------------------------------------|--------------|------|--------------|----------|-------------------|-----------|-----------------------------------------------------------------------------------------------------------------------------------------------------------------------------------------------------------------------------------------------------------------------------------------------------------------------------------------------------------------------------------------------------------------------------------------------------------------------------------------------------------------------------------------------------------------------------------------------------------------------------------------------------------------------------------------------------------------------------------------------------------------------------------------------------------------------------------------------------------------------------------------------------------------------------------------------------------------------------------------------------------------------------------------------------------------------------------------------------------------------------------------------------------------------------------------------------------------------------------------------------------------------------------------------------------------------------------------------------------------------------------------------------------------------------------------------------------------------------|-----------|
| Fermented Food                                                              | Intervention | Dose | Study Design | <i>n</i> | Analytical Method | Biosample | Candidate FIBs <sup>a</sup>                                                                                                                                                                                                                                                                                                                                                                                                                                                                                                                                                                                                                                                                                                                                                                                                                                                                                                                                                                                                                                                                                                                                                                                                                                                                                                                                                                                                                                                 | Reference |
|                                                                             |              |      |              |          |                   |           | <ul style="list-style-type: none"> <li>• Azaspirazid</li> <li>• Caffeic acid</li> <li>• Catechol sulfate (pyrocatechol sulfate)</li> <li>• Coumaroyl-glucose</li> <li>• DHPV-O-methyl-O-sulfate</li> <li>• DHPV-O-glucuronide</li> <li>• Dibenzyl disulfide</li> <li>• Dihydropteridine</li> <li>• Ethyl 1-(ethylthio)propyl disulfide</li> <li>• Ethyl maltol</li> <li>• (iso)Ferulic acid sulfate</li> <li>• (iso)Ferulic acid sulfate</li> <li>• Galactosylglycerol</li> <li>• Glucosinalbin</li> <li>• Hesperetin-O-sulfate</li> <li>• Hordatine B glucoside</li> <li>• Hydroxytyrosol</li> <li>• Kanzonol I</li> <li>• Kanzonol R</li> <li>• Luteolin sulfate</li> <li>• L-γ-glutamyl-L-(iso)leucine</li> <li>• Methyl helianthoate F glucoside</li> <li>• Methylisocitric acid</li> <li>• Monoglyceride citrate</li> <li>• O-methoxycatechol-O-sulfate</li> <li>• O-methoxycatechol-O-sulfate</li> <li>• O-ureidohomoserine</li> <li>• Oxovaleric acid</li> <li>• p-Chlorobenzenesulfonyl urea</li> <li>• Phenol sulfate</li> <li>• Phenylalanyl aspartate</li> <li>• Phloroglucinol</li> <li>• Pyrogallol sulfate</li> <li>• Salicylate glucuronide</li> <li>• Sulfohydroxybenzoic acid</li> <li>• Tartaric acid</li> <li>• Tyrosol sulfate</li> <li>• Tyrosol sulfate</li> <li>• Valechlorin</li> <li>• Vanillic acid 4-sulfate</li> <li>• Vanillin 4-sulfate</li> <li>• Wthyl hydrogen sulfate</li> <li>• Wyeronic acid</li> <li>• α-Terpinyl cinnamate</li> </ul> |           |

| Summary of Untargeted Studies Presenting Candidate FIBs for Fermented Foods |                                                                          |              |                                          |                                       |                                                      |           |                                                                                                                                                                                                                                                                                                                                                                                                                                                                                                                                                                      |           |
|-----------------------------------------------------------------------------|--------------------------------------------------------------------------|--------------|------------------------------------------|---------------------------------------|------------------------------------------------------|-----------|----------------------------------------------------------------------------------------------------------------------------------------------------------------------------------------------------------------------------------------------------------------------------------------------------------------------------------------------------------------------------------------------------------------------------------------------------------------------------------------------------------------------------------------------------------------------|-----------|
| Fermented Food                                                              | Intervention                                                             | Dose         | Study Design                             | <i>n</i>                              | Analytical Method                                    | Biosample | Candidate FIBs <sup>a</sup>                                                                                                                                                                                                                                                                                                                                                                                                                                                                                                                                          | Reference |
| Wine                                                                        | Wine (administered with grapes) administered as part of a food challenge | Not reported | Acute intervention                       | 7 healthy adults                      | NMR                                                  | Urine     | <ul style="list-style-type: none"> <li>• 2,3-Butanediol</li> <li>• 2-Isopropylmalate</li> <li>• Diethylmalonate</li> </ul>                                                                                                                                                                                                                                                                                                                                                                                                                                           | (37)      |
| Wine                                                                        | Red wine vs. no red wine                                                 | 250 mL/day   | 4-week, randomized, controlled, parallel | 33 healthy adults; 8 in control group | U(H)PLC-TOF (untargeted)                             | Feces     | <ul style="list-style-type: none"> <li>• 2,3-Pentanedione acid</li> <li>• 2-Hydroxyglutaric acid</li> <li>• 2-Methylbutyric acid</li> <li>• 2-Phenethyl butyrate</li> <li>• 2-Phenylethyl hexanoate</li> <li>• 4-Hydroxy-5-(3-hydroxyphenyl) valeric acid</li> <li>• 4-Hydroxy-5-(phenyl) valeric acid</li> <li>• Benzoic acid</li> <li>• Cholesterol sulfate</li> <li>• Deoxycholic acid</li> <li>• DHPV</li> <li>• Diethylmalonate</li> <li>• Docosahexaenoic acid methyl ester</li> <li>• Glutaric acid</li> <li>• Stercobilin</li> <li>• Urobilinogen</li> </ul> | (38)      |
|                                                                             |                                                                          |              |                                          |                                       | U(H)PLC-ESI-MS/MS (targeted for microbial phenolics) |           | <ul style="list-style-type: none"> <li>• DHBA</li> <li>• 3-Hydroxyphenylacetic acid</li> <li>• 3-O-Methylgallic acid</li> <li>• 3-Phenylpropionate</li> <li>• 4-hydroxy-5-(3,4-dihydroxyphenyl) valeric acid</li> <li>• 4-Hydroxy-5-(phenyl) valeric acid</li> <li>• DHPV</li> <li>• Protocatechuic acid</li> <li>• Syringic acid</li> <li>• Vanillic acid</li> </ul>                                                                                                                                                                                                |           |
| Wine                                                                        | Red wine vs. no red wine                                                 | 250 mL/day   | 4-week, randomized, controlled, parallel | 33 healthy adults; 8 in control group | U(H)PLC-TOF-MS                                       | Feces     | <ul style="list-style-type: none"> <li>• 2,3,-Pentanedione</li> <li>• 2-Hydroxyglutaric acid</li> <li>• 2-Methylbutyric acid</li> <li>• 2-Phenethyl butyrate</li> <li>• 2-Phenylethyl hexanoate</li> <li>• 4-Hydroxy-5-(3-hydroxyphenyl) valeric acid</li> <li>• 4-Hydroxy-5-(phenyl) valeric acid</li> <li>• Benzoic acid</li> <li>• Cholesterol sulfate</li> <li>• Deoxycholic acid</li> <li>• DHPV</li> <li>• Diethylmalonate</li> </ul>                                                                                                                          | (39)      |

| Summary of Untargeted Studies Presenting Candidate FIBs for Fermented Foods |                                                                        |                                      |                                           |                                  |                   |           |                                                                                                                                                                                                                                                                                                                                                                                                                                                                                                                                                                                                                                                                                                                                                                                                                                                                                                                                                                                                                                                                                                                                           |           |
|-----------------------------------------------------------------------------|------------------------------------------------------------------------|--------------------------------------|-------------------------------------------|----------------------------------|-------------------|-----------|-------------------------------------------------------------------------------------------------------------------------------------------------------------------------------------------------------------------------------------------------------------------------------------------------------------------------------------------------------------------------------------------------------------------------------------------------------------------------------------------------------------------------------------------------------------------------------------------------------------------------------------------------------------------------------------------------------------------------------------------------------------------------------------------------------------------------------------------------------------------------------------------------------------------------------------------------------------------------------------------------------------------------------------------------------------------------------------------------------------------------------------------|-----------|
| Fermented Food                                                              | Intervention                                                           | Dose                                 | Study Design                              | <i>n</i>                         | Analytical Method | Biosample | Candidate FIBs <sup>a</sup>                                                                                                                                                                                                                                                                                                                                                                                                                                                                                                                                                                                                                                                                                                                                                                                                                                                                                                                                                                                                                                                                                                               | Reference |
|                                                                             |                                                                        |                                      |                                           |                                  |                   |           | <ul style="list-style-type: none"> <li>• <b>Docosahexaenoic acid methyl ester</b></li> </ul>                                                                                                                                                                                                                                                                                                                                                                                                                                                                                                                                                                                                                                                                                                                                                                                                                                                                                                                                                                                                                                              |           |
| Wine                                                                        | Red wine, dealcoholized vs. red wine, alcoholized vs. gin (comparator) | 272 mL/day (wines); 100 mL/day (gin) | 28-day, randomized, controlled, crossover | 61 healthy men with high CV risk | NMR               | Urine     | <ul style="list-style-type: none"> <li>• <b>3-Methyl-2-oxovalerate</b></li> <li>• <b>4-Hydroxyphenylacetate</b></li> <li>• <b>Ethanol</b></li> <li>• <b>Hippurate</b></li> <li>• <b>Mannitol</b></li> <li>• <b>Tartrate</b></li> <li>• <b>Trigonelline</b></li> <li>• 1-Methylnicotinamide</li> <li>• 2-Hydroxyisobutyrate</li> <li>• 3-Hydroxyisobutyrate</li> <li>• 3-Hydroxymandelate</li> <li>• Acetate</li> <li>• Acetoacetate</li> <li>• Acetone</li> <li>• Acetylcarnitine</li> <li>• Alanine</li> <li>• Betaine</li> <li>• Carnitine</li> <li>• cis-Aconitate</li> <li>• Citrate</li> <li>• Creatine</li> <li>• Creatinine</li> <li>• Dimethylamine</li> <li>• Formate</li> <li>• Fucose</li> <li>• Glucose</li> <li>• Glycine</li> <li>• Glycylproline</li> <li>• Histidine</li> <li>• Indole-3-acetate</li> <li>• Lactate</li> <li>• Leucine</li> <li>• Lysine</li> <li>• Malonate</li> <li>• Methylsuccinate</li> <li>• N-Methylhistidine</li> <li>• N-N</li> <li>• N-Phenylacetyl glycine</li> <li>• Succinate</li> <li>• Taurine</li> <li>• Threonine</li> <li>• Trimethylamine</li> <li>• Trimethylamine-N-oxide</li> </ul> | (40)      |

| Summary of Untargeted Studies Presenting Candidate FIBs for Fermented Foods |                                                                  |                                                                             |                                                                                            |                                     |                   |           |                                                                                                                                                                                                                                                                                                                                                                                    |           |
|-----------------------------------------------------------------------------|------------------------------------------------------------------|-----------------------------------------------------------------------------|--------------------------------------------------------------------------------------------|-------------------------------------|-------------------|-----------|------------------------------------------------------------------------------------------------------------------------------------------------------------------------------------------------------------------------------------------------------------------------------------------------------------------------------------------------------------------------------------|-----------|
| Fermented Food                                                              | Intervention                                                     | Dose                                                                        | Study Design                                                                               | <i>n</i>                            | Analytical Method | Biosample | Candidate FIBs <sup>a</sup>                                                                                                                                                                                                                                                                                                                                                        | Reference |
|                                                                             |                                                                  |                                                                             |                                                                                            |                                     |                   |           | <ul style="list-style-type: none"> <li>• Tyrosine</li> <li>• Urea</li> <li>• Valine</li> </ul>                                                                                                                                                                                                                                                                                     |           |
| Wine                                                                        | Red wine, dealcoholized; Red wine, alcoholized; Gin (comparator) | 272 mL/day (wines); 100 mL/day (gin)                                        | 28-day, randomized, controlled, crossover                                                  | 56 adults/elderly with high CV risk | NMR               | Urine     | <ul style="list-style-type: none"> <li>• <b>2,3-Butanediol</b></li> <li>• <b>2-methyl-2-oxovalerate</b></li> <li>• <b>4-Hydroxyphenylacetate</b></li> <li>• <b>Ethanol</b></li> <li>• <b>Ethyl glucuronide</b></li> <li>• <b>Hippurate</b></li> <li>• <b>Mannitol</b></li> <li>• <b>Tartrate</b></li> </ul>                                                                        | (41)      |
|                                                                             | Wine                                                             | 0 mL/day (non-consumer); <180 mL/day (intermittent); ≥180 mL/day (consumer) | 5-year, multi-centre, randomized, controlled, parallel, single-blind (baseline assessment) | 91 adults/elderly with high CV risk |                   |           | <ul style="list-style-type: none"> <li>• <b>2,3-Butanediol</b></li> <li>• <b>2-methyl-2-oxovalerate</b></li> <li>• <b>Ethanol</b></li> <li>• <b>Ethyl glucuronide</b></li> <li>• <b>Mannitol</b></li> <li>• <b>Tartrate</b></li> </ul>                                                                                                                                             |           |
| Wine                                                                        | Red wine, dealcoholized vs. no wine                              | 272 mL/day                                                                  | 28-day, randomized, controlled, crossover                                                  | 57 adults/elderly with high CV risk | NMR               | Urine     | <ul style="list-style-type: none"> <li>• <b>3-Hydroxyphenylacetic acid</b></li> <li>• <b>4-Hydroxyphenylacetate</b></li> <li>• <b>Betaine</b></li> <li>• <b>Dimethylamine</b></li> <li>• <b>Fucose</b></li> <li>• <b>Glucose</b></li> <li>• <b>Lactate</b></li> <li>• <b>Mannitol</b></li> <li>• <b>Methanol</b></li> <li>• <b>Tartrate</b></li> <li>• <b>Threonine</b></li> </ul> | (42)      |
| Cheese                                                                      | Cheese (hard, yellow Samsø)                                      | 143 g/day                                                                   | 6-week, randomized, controlled, crossover                                                  | 23 healthy adults                   | U(H)PLC-QTOF-MS   | Urine     | <ul style="list-style-type: none"> <li>• 4-Hydroxyphenylacetate</li> <li>• Indoxyl sulfate</li> <li>• Isobutyrylglycine</li> <li>• Isovalerylglutamic acid</li> <li>• Isovalerylglycine</li> <li>• Triglylglycine</li> <li>• Tyramine sulfate</li> <li>• Xanthurenic acid</li> </ul>                                                                                               | (43)      |
| Cheese                                                                      | Cheese (Gruyere)                                                 | 100 g + 500 mL water                                                        | Acute, randomized, controlled, crossover                                                   | 11 healthy adults                   | GC-MS             | Urine     | <ul style="list-style-type: none"> <li>• <b>3-Phenyllactic acid</b></li> <li>• <b>4-Methylcatechol</b></li> <li>• <b>Alanine</b></li> <li>• <b>Lactic acid</b></li> <li>• <b>Pyroglutamic acid</b></li> </ul>                                                                                                                                                                      | (44)      |
|                                                                             |                                                                  |                                                                             |                                                                                            |                                     | NMR               |           | <ul style="list-style-type: none"> <li>• <b>Alanine</b></li> </ul>                                                                                                                                                                                                                                                                                                                 |           |

| Summary of Untargeted Studies Presenting Candidate FIBs for Fermented Foods |                                  |                                               |                                           |                       |                       |                          |                                                                                                                                                                                                                                                                                                                                                                                                                                                                                                                                 |           |
|-----------------------------------------------------------------------------|----------------------------------|-----------------------------------------------|-------------------------------------------|-----------------------|-----------------------|--------------------------|---------------------------------------------------------------------------------------------------------------------------------------------------------------------------------------------------------------------------------------------------------------------------------------------------------------------------------------------------------------------------------------------------------------------------------------------------------------------------------------------------------------------------------|-----------|
| Fermented Food                                                              | Intervention                     | Dose                                          | Study Design                              | <i>n</i>              | Analytical Method     | Biosample                | Candidate FIBs <sup>a</sup>                                                                                                                                                                                                                                                                                                                                                                                                                                                                                                     | Reference |
|                                                                             |                                  |                                               |                                           |                       |                       |                          | <ul style="list-style-type: none"> <li>• <b>Proline</b></li> <li>• <b>Pyroglutamic acid</b></li> </ul>                                                                                                                                                                                                                                                                                                                                                                                                                          |           |
| Cheese                                                                      | Cheese (semihard, cow)           | 1.859 g/day                                   | 2-week, randomized, controlled, crossover | 15 healthy men        | NMR                   | Feces                    | <ul style="list-style-type: none"> <li>• <b>Acetate</b></li> <li>• <b>Butyrate</b></li> <li>• <b>Malonate</b></li> <li>• <b>Propionate</b></li> </ul>                                                                                                                                                                                                                                                                                                                                                                           | (45)      |
|                                                                             |                                  |                                               |                                           |                       |                       | Urine                    | <ul style="list-style-type: none"> <li>• <b>Hippurate</b></li> <li>• <b>Proline betaine</b></li> <li>• <b>Tyrosine</b></li> <li>• <b>Urea</b></li> </ul>                                                                                                                                                                                                                                                                                                                                                                        |           |
| Cheese                                                                      | Cheese vs. milk vs. soy beverage | 100 g (cheese), 600 mL (milk or soy beverage) | Acute, randomized, controlled, crossover  | 11 healthy volunteers | HS-GC-MS (Untargeted) | Plasma, urine (volatile) | <ul style="list-style-type: none"> <li>• <b>Heptan-2-one (plasma)</b></li> <li>• <b>Undecan-2-one (plasma)</b></li> <li>• <b>Heptan-4-one (urine)</b></li> </ul>                                                                                                                                                                                                                                                                                                                                                                | (46)      |
| Cheese                                                                      | Cheese vs. milk vs. soy beverage | 100 g (cheese); 600 mL (milk or soy beverage) | Acute, randomized, controlled, crossover  | 11 healthy volunteers | LC-MS (Untargeted)    | Plasma, urine            | <ul style="list-style-type: none"> <li>• <b>Amino adipic acid</b></li> <li>• <b>Citrulline</b></li> <li>• <b>Valyl-threonine</b></li> <li>• <b>Phenylalanyl-proline</b></li> <li>• <b>Indolelactic acid</b></li> <li>• <b>Proline</b></li> </ul>                                                                                                                                                                                                                                                                                | (47)      |
| Cheese                                                                      | Cheese (Gruyere) vs. baseline    | 100 g + 500 mL water                          | Acute, randomized, controlled, crossover  | 11 healthy adults     | GC-MS                 | Serum                    | <ul style="list-style-type: none"> <li>• <b>Methionine</b></li> <li>• <b>Proline</b></li> <li>• <b>Leucine</b></li> <li>• <b>Glutamic acid</b></li> <li>• <b>3-Phenyllactic acid</b></li> <li>• <b>Pentadecanoic acid (C15:0)</b></li> <li>• <b>Heptadecanoic acid (C17:0)</b></li> <li>• Lactose</li> <li>• Galacitol</li> <li>• Galactono-1,5-lactone</li> <li>• Dodecanoic acid</li> <li>• Linoleic acid</li> <li>• Gamma-tocopherol</li> <li>• Maltol</li> <li>• Sucrose</li> <li>• Guaiacol</li> <li>• Catechol</li> </ul> | (48)      |
|                                                                             |                                  |                                               |                                           |                       | NMR                   |                          | <ul style="list-style-type: none"> <li>• <b>Methionine</b></li> <li>• <b>Tyrosine</b></li> <li>• <b>Valine+isoleucine</b></li> <li>• <b>3-Hydroxyisobutyrate</b></li> <li>• Lipid=CH-CH2-CH=</li> </ul>                                                                                                                                                                                                                                                                                                                         |           |
| Fermented milk                                                              | Probiotic fermented milk         | 0.4 L/day                                     | 8-week, randomized,                       | 31 IBS patients       | NMR                   | Serum                    | <ul style="list-style-type: none"> <li>• <b>3-Hydroxybutyrate</b></li> <li>• <b>D-Lactate</b></li> </ul>                                                                                                                                                                                                                                                                                                                                                                                                                        | (49)      |



| Summary of Untargeted Studies Presenting Candidate FIBs for Fermented Foods |                          |                                                      |                                                         |                                               |                         |           |                                                                                                                                                                                                                                                                                    |           |                                                                                                                                                                                                                                                                                                                  |
|-----------------------------------------------------------------------------|--------------------------|------------------------------------------------------|---------------------------------------------------------|-----------------------------------------------|-------------------------|-----------|------------------------------------------------------------------------------------------------------------------------------------------------------------------------------------------------------------------------------------------------------------------------------------|-----------|------------------------------------------------------------------------------------------------------------------------------------------------------------------------------------------------------------------------------------------------------------------------------------------------------------------|
| Fermented Food                                                              | Intervention             | Dose                                                 | Study Design                                            | <i>n</i>                                      | Analytical Method       | Biosample | Candidate FIBs <sup>a</sup>                                                                                                                                                                                                                                                        | Reference |                                                                                                                                                                                                                                                                                                                  |
|                                                                             |                          |                                                      | controlled, parallel                                    |                                               |                         |           | <ul style="list-style-type: none"> <li>• L-lactate</li> </ul>                                                                                                                                                                                                                      |           |                                                                                                                                                                                                                                                                                                                  |
| Fermented milk                                                              | Probiotic fermented milk | 0.4 L/day                                            | 8-week, randomized, controlled, parallel                | 31 IBS patients                               | GC-MS                   | Serum     | <ul style="list-style-type: none"> <li>• Aspartic acid</li> <li>• Creatine/creatinine</li> <li>• Glutamine</li> <li>• Lactate</li> <li>• Proline</li> </ul>                                                                                                                        | (50)      |                                                                                                                                                                                                                                                                                                                  |
| Yoghurt                                                                     | Yoghurt vs. baseline     | 800 g                                                | Acute, randomized, controlled, double-blind, crossover  | 14 healthy men                                | LC-MS                   | Serum     | <ul style="list-style-type: none"> <li>• Phenylalanine</li> <li>• Threonine</li> <li>• Lysine</li> <li>• Proline</li> <li>• Asparagine</li> <li>• Tyrosine</li> <li>• Tryptophan</li> <li>• Citrulline</li> <li>• Indole-3-lactic acid</li> <li>• Indole-3-acetaldehyde</li> </ul> | (51)      |                                                                                                                                                                                                                                                                                                                  |
|                                                                             |                          |                                                      | 2-week, randomized, controlled, double-blind, crossover |                                               |                         |           | <ul style="list-style-type: none"> <li>• Proline</li> <li>• Lysine</li> <li>• Threonine</li> <li>• Citrulline</li> <li>• Indole-3-lactic acid</li> <li>• Indole-3-acetaldehyde</li> </ul>                                                                                          |           |                                                                                                                                                                                                                                                                                                                  |
| Beer, coffee, wine                                                          | Beer                     | Habitual intake (dose not reported); assessed by FFQ | Case-control                                            | 125 patients with colon adenoma; 128 controls | U(H)PLC-MS/MS and GC-MS | Urine     | <ul style="list-style-type: none"> <li>• Glycerol 3-phosphate</li> <li>• Homovanillate sulfate</li> </ul>                                                                                                                                                                          | (52)      |                                                                                                                                                                                                                                                                                                                  |
|                                                                             | Coffee, caffeinated      | Habitual intake (dose not reported); assessed by FFQ |                                                         |                                               |                         |           | Serum                                                                                                                                                                                                                                                                              |           | <ul style="list-style-type: none"> <li>• 1,3,7-Trimethylurate</li> <li>• 1,3-Dimethylurate</li> <li>• 1,7-Dimethylurate</li> <li>• 1-Methylxanthine</li> <li>• Caffeine</li> <li>• Catechol sulfate</li> <li>• N-(2-furoyl)glycine</li> <li>• Quinate</li> <li>• Theophylline</li> <li>• Trigonelline</li> </ul> |
|                                                                             | Coffee, caffeinated      | Habitual intake (dose not reported); assessed by FFQ |                                                         |                                               |                         |           | Urine                                                                                                                                                                                                                                                                              |           | <ul style="list-style-type: none"> <li>• 1,3,7-Trimethylurate</li> <li>• 1,3-Dimethylurate</li> <li>• 1,7-Dimethylurate</li> <li>• 1-Methylurate</li> <li>• 1-Methylxanthine</li> <li>• AAMU</li> </ul>                                                                                                          |

| Summary of Untargeted Studies Presenting Candidate FIBs for Fermented Foods |                                                                                   |                                                      |                                                        |                   |                   |           |                                                                                                                                                                                                                                                                                                                                                                                                                                                                                                                                                                                                                                                                                                                                                                                                                                                                                                                                                                                                                                                |           |
|-----------------------------------------------------------------------------|-----------------------------------------------------------------------------------|------------------------------------------------------|--------------------------------------------------------|-------------------|-------------------|-----------|------------------------------------------------------------------------------------------------------------------------------------------------------------------------------------------------------------------------------------------------------------------------------------------------------------------------------------------------------------------------------------------------------------------------------------------------------------------------------------------------------------------------------------------------------------------------------------------------------------------------------------------------------------------------------------------------------------------------------------------------------------------------------------------------------------------------------------------------------------------------------------------------------------------------------------------------------------------------------------------------------------------------------------------------|-----------|
| Fermented Food                                                              | Intervention                                                                      | Dose                                                 | Study Design                                           | <i>n</i>          | Analytical Method | Biosample | Candidate FIBs <sup>a</sup>                                                                                                                                                                                                                                                                                                                                                                                                                                                                                                                                                                                                                                                                                                                                                                                                                                                                                                                                                                                                                    | Reference |
|                                                                             |                                                                                   |                                                      |                                                        |                   |                   |           | <ul style="list-style-type: none"> <li>• AFMU</li> <li>• Caffeine</li> <li>• Catechol sulfate</li> <li>• Hippurate</li> <li>• Homovanillate sulfate</li> <li>• N-(2-furoyl)glycine</li> <li>• Nicotinate</li> <li>• Pseudouridine</li> <li>• Quinate</li> <li>• Theophylline</li> <li>• Trigonelline</li> </ul>                                                                                                                                                                                                                                                                                                                                                                                                                                                                                                                                                                                                                                                                                                                                |           |
|                                                                             | Coffee, decaffeinated                                                             | Habitual intake (dose not reported); assessed by FFQ |                                                        |                   |                   | Serum     | <ul style="list-style-type: none"> <li>• 1,7-Dimethylurate</li> <li>• 3-methoxytyrosine</li> </ul>                                                                                                                                                                                                                                                                                                                                                                                                                                                                                                                                                                                                                                                                                                                                                                                                                                                                                                                                             |           |
|                                                                             | Wine                                                                              | Habitual intake (dose not reported); assessed by FFQ |                                                        |                   |                   | Urine     | <ul style="list-style-type: none"> <li>• 2,3-Dihydroxyisovalerate</li> <li>• 2-Isopropylmalate</li> <li>• Nicotine</li> </ul>                                                                                                                                                                                                                                                                                                                                                                                                                                                                                                                                                                                                                                                                                                                                                                                                                                                                                                                  |           |
| Beer                                                                        | Strong lager vs. regular lager vs. light/alcohol-free beer vs. control soft drink | 330 mL                                               | 3-day, randomized, controlled, single-blind, crossover | 37 healthy adults | U(H)PLC-QTOF-MS   | Plasma    | <ul style="list-style-type: none"> <li>• Hydroxy alloiso-cohumulone, cohumulinone</li> <li>• 2-ethyl malate</li> <li>• Cysteine conjugate of NO<sub>2</sub> or CH<sub>2</sub>O<sub>2</sub> adducted iso-ad/humulone</li> <li>• Cysteine conjugate of NO<sub>2</sub> or CH<sub>2</sub>O<sub>2</sub> adducted iso-cohumulone</li> <li>• Dihydroxylated iso-ad/humulone</li> <li>• Dihydroxylated iso-ad/humulone II</li> <li>• Hordenine</li> <li>• Hydroxy alloiso-ad/humulones, humulinone</li> <li>• Iso/leucine</li> <li>• Iso-cohumulone</li> <li>• Iso-n/ad-humulone</li> <li>• Iso-tricycload/humene</li> <li>• Iso-tricyclohumene</li> <li>• Maltose</li> <li>• N-methyl tyramine sulfate</li> <li>• NO or CH<sub>2</sub>O adduct of iso-ad/humulone</li> <li>• NO or CH<sub>2</sub>O adduct of iso-cohumulone</li> <li>• NO<sub>2</sub> or CH<sub>2</sub>O<sub>2</sub> adduct of iso-cohumulone</li> <li>• NO<sub>2</sub> or CH<sub>2</sub>O<sub>2</sub> conjugate adduct of iso-ad/humulone</li> <li>• Pyroglutamyl proline</li> </ul> | (53)      |

| Summary of Untargeted Studies Presenting Candidate FIBs for Fermented Foods |                                                                    |                                                                                                                                                                                                                                                                             |                                           |                                                                                        |                                                 |           |                                                                                                                                                                                                                                                                                                                                                                                                                                                                              |           |
|-----------------------------------------------------------------------------|--------------------------------------------------------------------|-----------------------------------------------------------------------------------------------------------------------------------------------------------------------------------------------------------------------------------------------------------------------------|-------------------------------------------|----------------------------------------------------------------------------------------|-------------------------------------------------|-----------|------------------------------------------------------------------------------------------------------------------------------------------------------------------------------------------------------------------------------------------------------------------------------------------------------------------------------------------------------------------------------------------------------------------------------------------------------------------------------|-----------|
| Fermented Food                                                              | Intervention                                                       | Dose                                                                                                                                                                                                                                                                        | Study Design                              | <i>n</i>                                                                               | Analytical Method                               | Biosample | Candidate FIBs <sup>a</sup>                                                                                                                                                                                                                                                                                                                                                                                                                                                  | Reference |
|                                                                             |                                                                    |                                                                                                                                                                                                                                                                             |                                           |                                                                                        |                                                 |           | <ul style="list-style-type: none"> <li>• Tetra-cycload/humulol</li> <li>• Tetra-cyclocohumol, tricyclohumol</li> <li>• Tricycload/humulol, double hydroxylated iso-cohumulone</li> <li>• Tyrosine</li> </ul>                                                                                                                                                                                                                                                                 |           |
| Beer                                                                        | Beer, alcoholic                                                    | 660 mL/day                                                                                                                                                                                                                                                                  | 4-week, randomized, controlled, crossover | 33 men with high CV risk                                                               | HPLC-ESI-MS/MS (targeted plasma acylcarnitines) | Plasma    | <ul style="list-style-type: none"> <li>• Acylcarnitines</li> </ul>                                                                                                                                                                                                                                                                                                                                                                                                           | (54)      |
|                                                                             |                                                                    |                                                                                                                                                                                                                                                                             |                                           |                                                                                        | LC-MS (untargeted)                              |           | <ul style="list-style-type: none"> <li>• <b>1,2,3,4-Tetrahydro-1-methyl-beta-carboline-3-carboxylic acid</b></li> <li>• <b>2,3-Dihydroxy-3-methylvaleric acid</b></li> <li>• <b>2-Phenylethanol glucuronide</b></li> <li>• <b>4-Guanidinobutanoic acid</b></li> <li>• <b>Cohumulone</b></li> <li>• <b>Ethyl glucuronide</b></li> <li>• <b>Ethyl sulfate</b></li> <li>• <b>Humulinone</b></li> <li>• <b>Hydroxyadipic acid</b></li> <li>• <b>Oxyhumulinic acid</b></li> </ul> |           |
|                                                                             | HPLC-ESI-MS/MS (targeted plasma acylcarnitines)                    | <ul style="list-style-type: none"> <li>• Acylcarnitines</li> </ul>                                                                                                                                                                                                          |                                           |                                                                                        |                                                 |           |                                                                                                                                                                                                                                                                                                                                                                                                                                                                              |           |
|                                                                             | LC-MS (untargeted)                                                 | <ul style="list-style-type: none"> <li>• <b>2,3-dihydroxy-3-methylvaleric acid</b></li> <li>• <b>4-Guanidinobutanoic acid</b></li> <li>• <b>Cohumulone</b></li> <li>• <b>Humulinone</b></li> <li>• <b>Hydroxyadipic acid</b></li> <li>• <b>Oxyhumulinic acid</b></li> </ul> |                                           |                                                                                        |                                                 |           |                                                                                                                                                                                                                                                                                                                                                                                                                                                                              |           |
| Beer                                                                        | Habitual dietary intake                                            | Frequency of intake for 137 foods, including beer (from FFQ)                                                                                                                                                                                                                | Association study                         | 491 volunteers from the Prostate, Lung, Colorectal, and Ovarian Cancer Screening Trial | HILIC-QQQ-MRM (Untargeted)                      | Serum     | <ul style="list-style-type: none"> <li>• <b>Beer: C24:0 sphingomyelin</b></li> </ul>                                                                                                                                                                                                                                                                                                                                                                                         | (55)      |
| Rice beer                                                                   | Rice beer drinkers vs. non-drinkers In Ahom and Bodo ethnic groups | Drinkers or non-drinkers of rice beer (from questionnaire)                                                                                                                                                                                                                  | Cross-sectional                           | 134 healthy volunteers                                                                 | GC-MS (Untargeted)                              | Feces     | <ul style="list-style-type: none"> <li>• Propanoic, butyric, cis-vaccenic acids was higher in Ahom non-drinkers vs. drinkers</li> <li>• Butyric acid, rhamnose, arabinose, glycine, hydroxycinnamic acid, indole, formic acid, ursodeoxycholic acid, acetic acid, and benzoic acid was higher in Bodo non-drinkers vs. drinkers</li> </ul>                                                                                                                                   | (56)      |

| Summary of Untargeted Studies Presenting Candidate FIBs for Fermented Foods |                                                                                |                                                 |                               |                                              |                   |                                                                                   |                                                                                                                                                                                                                                                                                                                                                                                                                                                                                                                                                                                                                                                                                                                                                                                                                                          |           |
|-----------------------------------------------------------------------------|--------------------------------------------------------------------------------|-------------------------------------------------|-------------------------------|----------------------------------------------|-------------------|-----------------------------------------------------------------------------------|------------------------------------------------------------------------------------------------------------------------------------------------------------------------------------------------------------------------------------------------------------------------------------------------------------------------------------------------------------------------------------------------------------------------------------------------------------------------------------------------------------------------------------------------------------------------------------------------------------------------------------------------------------------------------------------------------------------------------------------------------------------------------------------------------------------------------------------|-----------|
| Fermented Food                                                              | Intervention                                                                   | Dose                                            | Study Design                  | <i>n</i>                                     | Analytical Method | Biosample                                                                         | Candidate FIBs <sup>a</sup>                                                                                                                                                                                                                                                                                                                                                                                                                                                                                                                                                                                                                                                                                                                                                                                                              | Reference |
|                                                                             |                                                                                |                                                 |                               |                                              |                   |                                                                                   | (250 metabolites were detected, but only 40 metabolites from microbial origin were considered)                                                                                                                                                                                                                                                                                                                                                                                                                                                                                                                                                                                                                                                                                                                                           |           |
| Post-fermented tea                                                          | Tea, pu-erh                                                                    | 200 mL/day                                      | 2-week, randomized, crossover | 20 healthy adults                            | U(H)PLC-QTOF-MS   | Urine                                                                             | <ul style="list-style-type: none"> <li>• <b>1,3-Dimethylurate</b></li> <li>• <b>1,7-Methyluric acid</b></li> <li>• <b>1-Methyluric acid</b></li> <li>• <b>1-Methylxanthine</b></li> <li>• <b>2-Hydroxybenzoic acid</b></li> <li>• <b>2-Methoxyphenol</b></li> <li>• <b>3,5-Hydroxybenzoic acid</b></li> <li>• <b>3-Hydroxyphenylacetic acid</b></li> <li>• <b>4-Aminobutanoic acid</b></li> <li>• <b>4-Aminobutanoic acid</b></li> <li>• <b>4-Hydroxy-3-methoxyphenylacetic acid</b></li> <li>• <b>Aminomalonic acid</b></li> <li>• <b>Caffeine</b></li> <li>• <b>Epigallocatechin</b></li> <li>• <b>Hippurate</b></li> <li>• <b>Nicotinic acid</b></li> <li>• <b>Ornithine</b></li> <li>• <b>Paraxanthine</b></li> <li>• <b>Phenol</b></li> <li>• <b>Theobromine</b></li> <li>• <b>Theophylline</b></li> <li>• <b>Valine</b></li> </ul> | (57)      |
| General fermented foods                                                     | Fermented food intake frequency (never, <1X/week, 1-2X/week, 3-5X/week, daily) | Habitual diet and activities; dose not reported | Cross-sectional               | 7 healthy adults who ferment their own foods | U(H)PLC-MS        | Multiple (biofilm, fermented food, forehead, indoor surface, hands, mouth, stool) | <ul style="list-style-type: none"> <li>• <b>Avobenzene (skin)</b></li> <li>• <b>Bacteriopheophytin (kimchi)</b></li> <li>• <b>Cholesterol and derivatives (skin)</b></li> <li>• <b>Gingerol (foods, indoor surfaces)</b></li> <li>• <b>Pheophytin A (foods of vegetable origin)</b></li> <li>• <b>Piperine (food, stool, indoor surfaces, skin)</b></li> <li>• <b>Plant flavonoids, lipids, plant sterols</b></li> <li>• <b>Polanrazine B (food, stool)</b></li> <li>• <b>Procyanidin B2 (biofilm, food, indoor surface, skin, stool)</b></li> <li>• <b>Pyropheophytin (kimchi)</b></li> </ul>                                                                                                                                                                                                                                           | (58)      |

Abbreviations: AAMU, 5-Acetylamino-6-amino-3-methyluracil; AFMU, 5-Acetylamino-6-formylamino-3-methyluracil; AMMU, 6-amino-5[N-methylformylamino]-1-methyluracil; AR, alkenylresorcinol; DCER, dihydroceramides; DHBA, 3,5-dihydroxybenzoic acid; DHPPA, 3-(3,5-dihydroxyphenyl)-1-propanoic acid; DHPPTA, 5-(3,5-dihydroxyphenyl) pentanoic acid; DHPV, 5-(3,4-dihydroxyphenyl)- $\gamma$ -valerolactone; ESI, electrospray ionization; FA, fatty acid; FFQ, food frequency questionnaire; FIB = food intake biomarker; FIE, flow injection electrospray; GC, gas chromatography; HBOA, 2-Hydroxy-1,4-benzoxazin-3-one; HHPAA, 2-Hydroxy-N-(2-hydroxyphenyl) acetamide; HILIC, hydrophilic interaction liquid chromatography; HPAA, N-(2-hydroxyphenyl) acetamide; HPLC, high-performance liquid chromatography; HS, headspace; IMS, ion mobility spectrometry; LC, liquid chromatography; LCER, lactosylceramides; MHPV, 3'-methoxy-4'-hydroxyphenylvalerolactone; MS, mass spectrometry; MRM, multiple reaction monitoring; MS/MS, tandem mass spectrometry; NMR, nuclear magnetic resonance; PC, phosphatidylcholine; PE, phosphatidylethanolamine; QQQ, triple quadrupole; QTOF, quadrupole time-of-flight; SPME, solid phase microextraction; TAG, triacylglycerol; TOF, time-of-flight; U(H)PLC, ultra-high performance liquid chromatography.

<sup>a</sup> Candidate FIBs that are significantly increased compared to control or baseline in each study are bolded. Candidate FIBs that are detected in the biosample, but not statistically significant, are not bolded.

## References

1. Andersen M-BS, Kristensen M, Manach C, Pujos-Guillot E, Poulsen SK, Larsen TM, et al. Discovery and validation of urinary exposure markers for different plant foods by untargeted metabolomics. *Anal Bioanal Chem.* 2014;406(7):1829-44.
2. Andersen M-BS, Rinnan A, Manach C, Poulsen SK, Pujos-Guillot E, Larsen TM, et al. Untargeted metabolomics as a screening tool for estimating compliance to a dietary pattern. *J Proteome Res.* 2014;13(3):1405-18.
3. Garcia-Aloy M, Llorach R, Urpi-Sarda M, Jauregui O, Corella D, Ruiz-Canela M, et al. A metabolomics-driven approach to predict cocoa product consumption by designing a multimetabolite biomarker model in free-living subjects from the PREDIMED study. *Mol Nutr Food Res.* 2015;59(2):212-20.
4. Llorach R, Urpi-Sarda M, Jauregui O, Monagas M, Andres-Lacueva C. An LC-MS-based metabolomics approach for exploring urinary metabolome modifications after cocoa consumption. *J Proteome Res.* 2009;8(11):5060-8.
5. Llorach R, Urpi-Sarda M, Tulipani S, Garcia-Aloy M, Monagas M, Andres-Lacueva C. Metabolomic fingerprint in patients at high risk of cardiovascular disease by cocoa intervention. *Mol Nutr Food Res.* 2013;57(6):962-73.
6. Llorach-Asuncion R, Jauregui O, Urpi-Sarda M, Andres-Lacueva C. Methodological aspects for metabolome visualization and characterization A metabolomic evaluation of the 24 h evolution of human urine after cocoa powder consumption. *J Pharm Biomed Anal.* 2010;51(2):373-81.
7. Ostertag LM, Philo M, Colquhoun IJ, Tapp HS, Saha S, Duthie GG, et al. Acute Consumption of Flavan-3-ol-Enriched Dark Chocolate Affects Human Endogenous Metabolism. *J Proteome Res.* 2017;16(7):2516-26.
8. Pallister T, Jennings A, Mohny RP, Yarand D, Mangino M, Cassidy A, et al. Characterizing blood metabolomics profiles associated with self-reported food intakes in female twins. *PLoS One.* 2016;11(6).
9. Hakeem Said I, Truex JD, Heidorn C, Retta MB, Petrov DD, Haka S, et al. LC-MS/MS based molecular networking approach for the identification of cocoa phenolic metabolites in human urine. *Food Res Int.* 2020;132.
10. Martin F-PJ, Rezzi S, Peré-Trepat E, Kamlage B, Collino S, Leibold E, et al. Metabolic effects of dark chocolate consumption on energy, gut microbiota, and stress-related metabolism in free-living subjects. *J Proteome Res.* 2009;8(12):5568-79.
11. Rezzi S, Ramadan Z, Martin F-PJ, Fay LB, van Bladeren P, Lindon JC, et al. Human metabolic phenotypes link directly to specific dietary preferences in healthy individuals. *J Proteome Res.* 2007;6(11):4469-77.
12. Wang Y, Gapstur SM, Carter BD, Hartman TJ, Stevens VL, Gaudet MM, et al. Untargeted Metabolomics Identifies Novel Potential Biomarkers of Habitual Food Intake in a Cross-Sectional Study of Postmenopausal Women. *J Nutr.* 2018;148(6):932-43.
13. Beckmann M, Lloyd AJ, Haldar S, Seal C, Brandt K, Draper J. Hydroxylated phenylacetamides derived from bioactive benzoxazinoids are bioavailable in humans after habitual consumption of whole grain sourdough rye bread. *Mol Nutr Food Res.* 2013;57(10):1859-73.
14. Bondia-Pons I, Nordlund E, Mattila I, Katina K, Aura AM, Kolehmainen M, et al. Postprandial differences in the plasma metabolome of healthy Finnish subjects after intake of a sourdough fermented endosperm rye bread versus white wheat bread. *Nutr J.* 2011;10(1).
15. Garcia-Aloy M, Llorach R, Urpi-Sarda M, Tulipani S, Salas-Salvadó J, Martínez-González MA, et al. Nutrimitabolomics fingerprinting to identify biomarkers of bread exposure in a free-living population from the PREDIMED study cohort. *Metabolomics.* 2014;11(1):155-65.
16. Hanhineva K, Lankinen MA, Pedret A, Schwab U, Kolehmainen M, Paananen J, et al. Nontargeted metabolite profiling discriminates diet-specific biomarkers for consumption of whole grains, fatty fish, and bilberries in a randomized controlled trial. *J Nutr.* 2015;145(1):7-17.
17. Lankinen M, Schwab U, Seppanen-Laakso T, Mattila I, Juntunen K, Mykkanen H, et al. Metabolomic Analysis of Plasma Metabolites That May Mediate Effects of Rye Bread on Satiety and Weight Maintenance in Postmenopausal Women. *J Nutr.* 2011;141(1):31-6.
18. Keski-Rahkonen P, Kolehmainen M, Lappi J, Micard V, Jokkala J, Rosa-Sibakov N, et al. Decreased plasma serotonin and other metabolite changes in healthy adults after consumption of wholegrain rye: an untargeted metabolomics study. *Am J Clin Nutr.* 2019;109(6):1630-9.
19. Zhu Y, Wang P, Sha W, Sang S. Urinary Biomarkers of Whole Grain Wheat Intake Identified by Non-targeted and Targeted Metabolomics Approaches. *Sci Rep.* 2016;6.
20. Hanhineva K, Keski-Rahkonen P, Lappi J, Katina K, Pekkinen J, Savolainen O, et al. The postprandial plasma rye fingerprint includes benzoxazinoid-derived phenylacetamide sulfates. *J Nutr.* 2014;144(7):1016-22.
21. Bondia-Pons I, Barri T, Hanhineva K, Juntunen K, Dragsted LO, Mykkänen H, et al. UPLC-QTOF/MS metabolic profiling unveils urinary changes in humans after a whole grain rye versus refined wheat bread intervention. *Mol Nutr Food Res.* 2013;57(3):412-22.
22. Cornelis MC, Erlund I, Michelotti GA, Herder C, Westerhuis JA, Tuomilehto J. Metabolomic response to coffee consumption: application to a three-stage clinical trial. *J Intern Med.* 2018;283(6):544-57.
23. Guertin KA, Lofffield E, Boca SM, Sampson JN, Moore SC, Xiao Q, et al. Serum biomarkers of habitual coffee consumption may provide insight into the mechanism underlying the association between coffee consumption and colorectal cancer. *Am J Clin Nutr.* 2015;101(5):1000-11.
24. Heinzmann SS, Holmes E, Kochhar S, Nicholson JK, Schmitt-Kopplin P. 2-Furoylglycine as a Candidate Biomarker of Coffee Consumption. *J Agric Food Chem.* 2015;63(38):8615-21.
25. Lang R, Wahl A, Stark T, Hofmann T. Urinary N-methylpyridinium and trigonelline as candidate dietary biomarkers of coffee consumption. *Mol Nutr Food Res.* 2011;55(11):1613-23.

26. Redeuil K, Smarrito-Menzozi C, Guy P, Rezzi S, Dionisi F, Williamson G, et al. Identification of novel circulating coffee metabolites in human plasma by liquid chromatography-mass spectrometry. *J Chromatogr A*. 2011;1218(29):4678-88.
27. Rothwell JA, Fillatre Y, Martin J-F, Lyan B, Pujos-Guillot E, Fezeu L, et al. New biomarkers of coffee consumption identified by the non-targeted metabolomic profiling of cohort study subjects. *PLoS One*. 2014;9(4):e93474.
28. Kuang A, Erlund I, Herder C, Westerhuis JA, Tuomilehto J, Cornelis MC. Lipidomic Response to Coffee Consumption. *Nutrients*. 2018;10(12).
29. Mack CI, Eger B, Liberto E, Weinert CH, Bub A, Hoffmann I, et al. Robust Markers of Coffee Consumption Identified Among the Volatile Organic Compounds in Human Urine. *Mol Nutr Food Res*. 2019;63(10):e1801060.
30. Papandreou C, Hernandez-Alonso P, Bullo M, Ruiz-Canela M, Yu E, Guasch-Ferre M, et al. Plasma Metabolites Associated with Coffee Consumption: A Metabolomic Approach within the PREDIMED Study. *Nutrients*. 2019;11(5).
31. Rothwell JA, Keski-Rahkonen P, Robinot N, Assi N, Casagrande C, Jenab M, et al. A Metabolomic Study of Biomarkers of Habitual Coffee Intake in Four European Countries. *Mol Nutr Food Res*. 2019;63(22):e1900659.
32. Lloyd AJ, Beckmann M, Haldar S, Seal C, Brandt K, Draper J. Data-driven strategy for the discovery of potential urinary biomarkers of habitual dietary exposure. *Am J Clin Nutr*. 2013;97(2):377-89.
33. Chau YP, Au PCM, Li GHY, Sing CW, Cheng VKF, Tan KCB, et al. Serum Metabolome of Coffee Consumption and its Association With Bone Mineral Density: The Hong Kong Osteoporosis Study. *J Clin Endocrinol Metab*. 2020;105(3).
34. Hang D, Zeleznik OA, He X, Guasch-Ferre M, Jiang X, Li J, et al. Metabolomic Signatures of Long-term Coffee Consumption and Risk of Type 2 Diabetes in Women. *Diabetes Care*. 2020.
35. Shi L, Brunius C, Johansson I, Bergdahl IA, Rolandsson O, van Guelpen B, et al. Plasma metabolite biomarkers of boiled and filtered coffee intake and their association with type 2 diabetes risk. *J Intern Med*. 2020;287(4):405-21.
36. Esteban-Fernandez A, Ibanez C, Simo C, Bartolome B, Moreno-Arribas MV. An Ultrahigh-Performance Liquid Chromatography-Time-of-Flight Mass Spectrometry Metabolomic Approach to Studying the Impact of Moderate Red-Wine Consumption on Urinary Metabolome. *J Proteome Res*. 2018;17(4):1624-35.
37. Heinzmann SS, Merrifield CA, Rezzi S, Kochhar S, Lindon JC, Holmes E, et al. Stability and robustness of human metabolic phenotypes in response to sequential food challenges. *J Proteome Res*. 2012;11(2):643-55.
38. Jiménez-Girón A, Muñoz-González I, Martín-Álvarez PJ, Moreno-Arribas MV, Bartolomé B. Towards the fecal metabolome derived from moderate red wine intake. *Metabolites*. 2014;4(4):1101-18.
39. Jiménez-Girón A, Ibanez C, Cifuentes A, Simo C, Muñoz-González I, Martín-Álvarez PJ, et al. Faecal metabolomic fingerprint after moderate consumption of red wine by healthy subjects. *J Proteome Res*. 2015;14(2):897-905.
40. Vázquez-Fresno R, Llorach R, Alcaro F, Rodríguez MA, Vinaixa M, Chiva-Blanch G, et al. <sup>1</sup>H-NMR-based metabolomic analysis of the effect of moderate wine consumption on subjects with cardiovascular risk factors. *Electrophoresis*. 2012;33(15):2345-54.
41. Vázquez-Fresno R, Llorach R, Urpi-Sarda M, Khymenets O, Bulló M, Corella D, et al. An NMR metabolomics approach reveals a combined-biomarkers model in a wine interventional trial with validation in free-living individuals of the PREDIMED study. *Metabolomics*. 2015;11(4):797-806.
42. Vázquez-Fresno R, Llorach R, Perera A, Mandal R, Feliz M, Tinahones FJ, et al. Clinical phenotype clustering in cardiovascular risk patients for the identification of responsive metabotypes after red wine polyphenol intake. *J Nutr Biochem*. 2016;28:114-20.
43. Hjerpsted JB, Ritz C, Schou SS, Tholstrup T, Dragsted LO. Effect of cheese and butter intake on metabolites in urine using an untargeted metabolomics approach. *Metabolomics*. 2014;10(6):1176-85.
44. Mürger LH, Trimigno A, Picone G, Freiburghaus C, Pimentel G, Burton KJ, et al. Identification of Urinary Food Intake Biomarkers for Milk, Cheese, and Soy-Based Drink by Untargeted GC-MS and NMR in Healthy Humans. *J Proteome Res*. 2017;16(9):3321-35.
45. Zheng H, Yde CC, Clausen MR, Kristensen M, Lorenzen J, Astrup A, et al. Metabolomics investigation to shed light on cheese as a possible piece in the French paradox puzzle. *J Agric Food Chem*. 2015;63(10):2830-9.
46. Fuchsmann P, Tena Stern M, Mürger LH, Pimentel G, Burton KJ, Vionnet N, et al. Nutrivolatilomics of Urinary and Plasma Samples to Identify Candidate Biomarkers after Cheese, Milk and Soy-Based Drink Intake in Healthy Humans. *J Proteome Res*. 2020.
47. Pimentel G, Burnand D, Mürger LH, Pralong FP, Vionnet N, Portmann R, et al. Identification of Milk and Cheese Intake Biomarkers in Healthy Adults Reveals High Interindividual Variability of Lewis System-Related Oligosaccharides. *J Nutr*. 2020;150(5):1058-67.
48. Trimigno A, Mürger L, Picone G, Freiburghaus C, Pimentel G, Vionnet N, et al. GC-MS Based Metabolomics and NMR Spectroscopy Investigation of Food Intake Biomarkers for Milk and Cheese in Serum of Healthy Humans. *Metabolites*. 2018;8(2).
49. Pedersen SMM, Nielsen NC, Andersen HJ, Olsson J, Simren M, Ohman L, et al. The serum metabolite response to diet intervention with probiotic acidified milk in irritable bowel syndrome patients is indistinguishable from that of non-probiotic acidified milk by <sup>1</sup>H NMR-based metabonomic analysis. *Nutrients*. 2010;2(11):1141-55.
50. Pedersen SMM, Nebel C, Nielsen NC, Andersen HJ, Olsson J, Simren M, et al. A GC-MS-based metabonomic investigation of blood serum from irritable bowel syndrome patients undergoing intervention with acidified milk products. *Eur Food Res Technol*. 2011;233(6):1013-21.
51. Pimentel G, Burton KJ, von Ah U, Butikofer U, Pralong FP, Vionnet N, et al. Metabolic Footprinting of Fermented Milk Consumption in Serum of Healthy Men. *J Nutr*. 2018;148(6):851-60.
52. Playdon MC, Sampson JN, Cross AJ, Sinha R, Guertin KA, Moy KA, et al. Comparing metabolite profiles of habitual diet in serum and urine. *Am J Clin Nutr*. 2016;104(3):776-89.

53. Gürdeniz G, Jensen MG, Meier S, Bech L, Lund E, Dragsted LO. Detecting Beer Intake by Unique Metabolite Patterns. *J Proteome Res.* 2016;15(12):4544-56.
54. Quifer-Rada P, Chiva-Blanch G, Jauregui O, Estruch R, Lamuela-Raventos RM. A discovery-driven approach to elucidate urinary metabolome changes after a regular and moderate consumption of beer and nonalcoholic beer in subjects at high cardiovascular risk. *Mol Nutr Food Res.* 2017;61(10).
55. Mazzilli KM, McClain KM, Lipworth L, Playdon MC, Sampson JN, Clish CB, et al. Identification of 102 Correlations between Serum Metabolites and Habitual Diet in a Metabolomics Study of the Prostate, Lung, Colorectal, and Ovarian Cancer Trial. *J Nutr.* 2020;150(4):694-703.
56. Deb D, Das S, Adak A, Khan MR. Traditional rice beer depletes butyric acid-producing gut bacteria *Faecalibacterium* and *Roseburia* along with fecal butyrate levels in the ethnic groups of Northeast India. *3 Biotech.* 2020;10(6):283.
57. Xie G, Zhao A, Zhao L, Chen T, Chen H, Qi X, et al. Metabolic fate of tea polyphenols in humans. *J Proteome Res.* 2012;11(6):3449-57.
58. Quinn RA, Navas-Molina JA, Hyde ER, Song SJ, Vazquez-Baeza Y, Humphrey G, et al. From Sample to Multi-Omics Conclusions in under 48 Hours. *mSystems.* 2016;1(2).
